# Supplementary material for: Exploration of N-hydroxy benzimidazole catalysts for hydrogen atom transfer reactions
Source: Royal Society of Chemistry journal article supplement (doi:10.1039/d2qo01860h), 2023-01-01
Supplement: d2qo01860h1.pdf [file d2qo01860h1.pdf]

## *Supporting Information*

# **Exploration of *N*-hydroxy benzimidazole catalysts for hydrogen atom transfer reactions**

Zhi-Xian Wu,<sup>1,2</sup> Xue-Tao Xu,<sup>1\*</sup> and Yu-Xin Luan<sup>2\*</sup>

<sup>1</sup> School of Biotechnology and Health Sciences, Wuyi University, Jiangmen 529020, China.

<sup>2</sup> State Key Laboratory and Institute of Elemento-Organic Chemistry, College of Chemistry, Nankai University, Tianjin 300071, China.

\*E-mail: [xuetaoxu@wyu.edu.cn](mailto:xuetaoxu@wyu.edu.cn); [yxluan@nankai.edu.cn](mailto:yxluan@nankai.edu.cn)

### **Table of Contents**

|                                                                          |    |
|--------------------------------------------------------------------------|----|
| 1 General Information.....                                               | 2  |
| 2 Preparation of Substrates.....                                         | 2  |
| 3 Synthesis of <i>N</i> -hydroxy catalysts.....                          | 4  |
| 4 Typical Procedure for Cu/ <i>N</i> -Hydroxy Catalyzed Annulation ..... | 9  |
| 5 Mechanistic Experiments.....                                           | 16 |
| 6 Gram-Scale Reaction.....                                               | 17 |
| 7 NHBI Catalyzed Other C–H Functionalization Reaction.....               | 17 |
| 8 NMR Spectra .....                                                      | 18 |
| 9 References.....                                                        | 44 |

## 1 General Information

All solvents were received from commercial sources without further purification. Commercially available reagents were used without further purification. Thin-layer chromatography (TLC) was performed by UV absorbance (254 nm). 200-300 mesh silica gel was used for column chromatography separation. NMR spectra were recorded on Bruker AV 400 spectrometer at 400 MHz ( $^1\text{H}$  NMR), 100 MHz ( $^{13}\text{C}$  NMR) and 162 MHz ( $^{31}\text{P}$  NMR). Proton and carbon chemical shifts are reported relative to the solvent used as an internal reference ( $\text{CDCl}_3$ :  $\delta_{\text{H}} = 7.26$  ppm;  $\delta_{\text{C}} = 77.16$  ppm). All coupling constants ( $J$  values) were reported in Hertz (Hz). Multiplicities are reported as follows: singlet (s), doublet (d), doublet of doublets (dd), triplet (t), triplet of doublets (td), quartet (q), and multiplet (m). High resolution mass spectra (HRMS) were recorded on an Agilent 6520 Q-TOF LC/MS with Electron Spray Ionization (ESI) resource.

## 2 Preparation of Substrates

### Procedure:

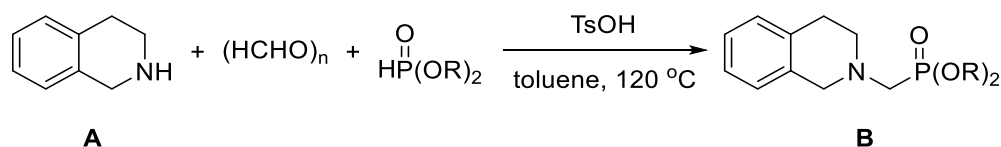

To a 100-mL round bottom flask equipped with a stir bar was added toluene (15 mL), 1,2,3,4- tetrahydroisoquinoline (**A**) (10 mmol, 1.0 equiv) and phosphite (12.5 mmol), paraformaldehyde (12.5 mmol, 0.40 g) and TsOH (0.025 mmol, 45 mg) in sequence. The mixture was stirred at 120 °C until the reaction was completed (monitored by TLC). After completion of the reaction, the mixture was cooled to room temperature, concentrated in vacuo. The crude product was purified by flash column chromatography on silica gel, eluting with Hexane/EtOAc.

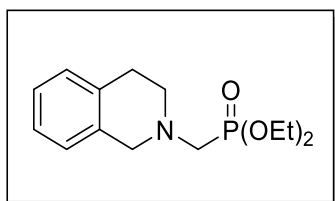

### diethyl ((3,4-dihydroisoquinolin-2(1H)-yl)methyl)phosphonate

Yellow oil (1.96 g, 69% yield).  $^1\text{H}$  NMR (400 MHz,  $\text{CDCl}_3$ )  $\delta$  7.15 - 7.05 (m, 3H), 7.02 - 6.98 (m, 1H), 4.23 - 4.10 (m, 4H), 3.85 (s, 2H), 3.02 - 2.87 (m, 6H), 1.33 (t,  $J = 7.2$  Hz, 6H).  $^{13}\text{C}$  NMR (100 MHz,  $\text{CDCl}_3$ )  $\delta$  134.1, 133.5, 128.2, 126.1, 125.8, 125.3, 61.7 (d,  $^2J_{\text{C-P}} = 6.7$  Hz), 56.9 (d,  $^3J_{\text{C-P}} = 11.0$  Hz), 53.3 (d,  $^1J_{\text{C-P}} = 162.8$  Hz), 52.1 (d,  $^3J_{\text{C-P}} = 9.8$  Hz), 28.6, 16.2 (d,  $^3J_{\text{C-P}} = 5.7$  Hz).  $^{31}\text{P}$  NMR (162 MHz,  $\text{CDCl}_3$ )  $\delta$  24.24

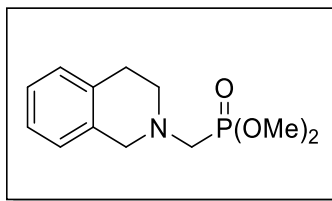

**dimethyl ((3,4-dihydroisoquinolin-2(1H)-yl)methyl)phosphonate**

Yellow oil (1.01 g, 36% yield).  $^1\text{H NMR}$  (400 MHz,  $\text{CDCl}_3$ )  $\delta$  7.13 - 7.06 (m, 3H), 7.01 - 6.99 (m, 1H), 3.83 (s, 2H), 3.79 (d,  $J = 10.8$ , 6H), 2.98 (d,  $J = 11.6$  Hz, 2H), 2.94 (d,  $J = 5.2$  Hz, 2H), 2.90 (d,  $J = 5.2$  Hz, 2H).  $^{13}\text{C NMR}$  (100 MHz,  $\text{CDCl}_3$ )  $\delta$  134.2, 133.6, 128.5, 126.4, 126.1, 125.6, 57.2 (d,  $^3J_{\text{C-P}} = 11.1$  Hz), 52.8 (d,  $^1J_{\text{C-P}} = 162.8$  Hz), 52.7 (d,  $^2J_{\text{C-P}} = 6.8$  Hz), 52.3 (d,  $^3J_{\text{C-P}} = 9.8$  Hz), 28.7.  $^{31}\text{P NMR}$  (162 MHz,  $\text{CDCl}_3$ )  $\delta$  26.59.

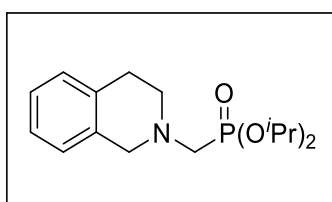

**diisopropyl ((3,4-dihydroisoquinolin-2(1H)-yl)methyl)phosphonate**

Yellow oil (2.10 g, 67% yield).  $^1\text{H NMR}$  (400 MHz,  $\text{CDCl}_3$ )  $\delta$  7.12 - 7.06 (m, 3H), 7.02 - 6.97 (m, 1H), 4.82 - 4.71 (m, 2H), 3.85 (s, 2H), 2.97 - 2.80 (m, 6H), 1.34 (dd,  $J = 6.4$  Hz, 3.6 Hz, 12H).  $^{13}\text{C NMR}$  (100 MHz,  $\text{CDCl}_3$ )  $\delta$  134.6, 133.9, 128.5, 126.4, 126.0, 125.5, 70.5 (d,  $^2J_{\text{C-P}} = 6.8$  Hz), 57.3 (d,  $^3J_{\text{C-P}} = 10.7$  Hz), 54.5 (d,  $^1J_{\text{C-P}} = 164.5$  Hz), 52.4 (d,  $^3J_{\text{C-P}} = 10.2$  Hz), 28.9, 24.1 (d,  $^3J_{\text{C-P}} = 3.7$  Hz), 24.0 (d,  $^3J_{\text{C-P}} = 4.9$  Hz).  $^{31}\text{P NMR}$  (162 MHz,  $\text{CDCl}_3$ )  $\delta$  22.46.

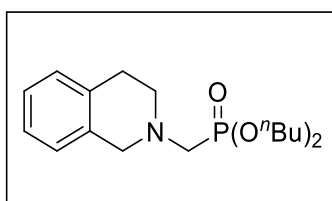

**dibutyl ((3,4-dihydroisoquinolin-2(1H)-yl)methyl)phosphonate**

Yellow oil (2.10 g, 67% yield).  $^1\text{H NMR}$  (400 MHz,  $\text{CDCl}_3$ )  $\delta$  7.11 (m, 3H), 7.04 - 6.97 (m, 1H), 4.09 (m, 4H), 3.84 (s, 2H), 3.02 - 2.83 (m, 6H), 1.66 (m, 4H), 1.40 (m, 4H), 0.92 (t,  $J = 7.4$  Hz, 6H).  $^{13}\text{C NMR}$  (100 MHz,  $\text{CDCl}_3$ )  $\delta$  134.4, 133.8, 128.5, 126.4, 126.0, 125.5, 65.8 (d,  $^2J_{\text{C-P}} = 6.9$  Hz), 57.2 (d,  $^3J_{\text{C-P}} = 10.7$  Hz), 53.5 (d,  $^1J_{\text{C-P}} = 162.6$  Hz), 52.4 (d,  $^3J_{\text{C-P}} = 9.9$  Hz), 32.6 (d,  $^3J_{\text{C-P}} = 5.8$  Hz), 28.8, 18.7, 13.5.  $^{31}\text{P NMR}$  (162 MHz,  $\text{CDCl}_3$ )  $\delta$  24.33.

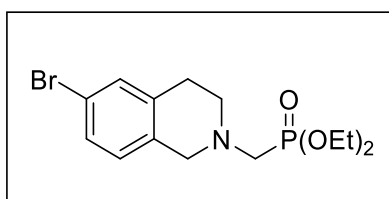

### diethyl ((6-bromo-3,4-dihydroisoquinolin-2(1*H*)-yl)methyl)phosphonate

Yellow oil (1.26 g, 89% yield).  $^1\text{H NMR}$  (400 MHz,  $\text{CDCl}_3$ )  $\delta$  7.23 – 7.21 (m, 2H), 6.88 (d,  $J = 7.9$  Hz, 1H), 4.17 (m, 4H), 3.79 (s, 2H), 3.02 – 2.85 (m, 6H), 1.33 (t,  $J = 7.1$  Hz, 6H).  $^{13}\text{C NMR}$  (100 MHz,  $\text{CDCl}_3$ )  $\delta$  136.1, 133.3, 131.2, 128.6, 128.0, 119.5, 62.0 (d,  $^2J_{\text{C-P}} = 6.8$  Hz), 56.6 (d,  $^3J_{\text{C-P}} = 10.6$  Hz), 53.4 (d,  $^1J_{\text{C-P}} = 162.5$  Hz), 51.8 (d,  $^3J_{\text{C-P}} = 10.0$  Hz), 28.6, 16.4 (d,  $J = 5.6$  Hz).  $^{31}\text{P NMR}$  (162 MHz,  $\text{CDCl}_3$ )  $\delta$  24.02. **HRMS** (ESI):  $m/z$   $[\text{M}+\text{H}]^+$  calcd. for  $\text{C}_{14}\text{H}_{22}\text{NO}_3\text{P}$ : 362.0516; Found: 362.0515.

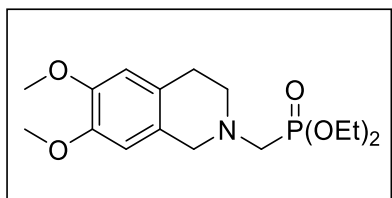

### diethyl ((6,7-dimethoxy-3,4-dihydroisoquinolin-2(1*H*)-yl)methyl)phosphonate

Yellow oil (2.10 g, 67% yield).  $^1\text{H NMR}$  (400 MHz,  $\text{CDCl}_3$ )  $\delta$  6.58 (s, 1H), 6.52 (s, 1H), 4.24 – 4.08 (m, 4H), 3.84 (s, 3H), 3.83 (s, 3H), 3.78 (s, 2H), 3.01 – 2.88 (m, 4H), 2.82 (s, 2H), 1.34 (t,  $J = 7.0$  Hz, 6H).  $^{13}\text{C NMR}$  (100 MHz,  $\text{CDCl}_3$ )  $\delta$  147.4, 147.1, 126.2, 125.6, 111.2, 109.3, 62.1 (d,  $^2J_{\text{C-P}} = 6.6$  Hz), 56.8 (d,  $^3J_{\text{C-P}} = 10.6$  Hz), 55.8, 53.5 (d,  $^1J_{\text{C-P}} = 162.9$  Hz), 52.5 (d,  $^3J_{\text{C-P}} = 10.3$ ), 28.2, 16.5 (d,  $J = 5.7$  Hz).  $^{31}\text{P NMR}$  (162 MHz,  $\text{CDCl}_3$ )  $\delta$  24.31.

## 3 Synthesis of *N*-hydroxy catalysts

*N*-Hydroxy catalysts were synthesized according to previous literature.<sup>1</sup>

### Procedure:

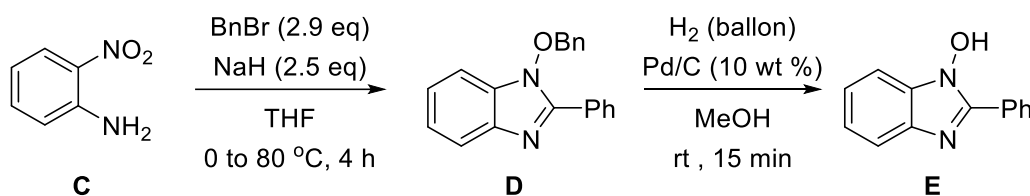

To a 50-mL round bottom flask equipped with a stir bar was added NaH (60% in oil, 2.3 g, 58 mmol, 2.9 equiv) in THF (30 mL), then 2-nitroaniline (2.68 g, 20 mmol, 1.0 equiv) was added portionwise to the suspension at 0 °C. The mixture was stirred at the same temperature for further 15 min. Benzyl bromide (4.9 mL, 50 mmol, 2.5 equiv) was added slowly to the solution, and the mixture was stirred at 80 °C for 4 h. After the reaction, the reaction mixture was cooled to room temperature, quenched with  $\text{H}_2\text{O}$  and extracted with ethyl acetate for three times. The combined organic layer was dried over  $\text{Na}_2\text{SO}_4$  and concentrated. The residue was purified by trituration with hexane and filtration to afford the following compound **D**.

To a 50-mL round bottom flask equipped with a stir bar was added **D** (1.4 g, 4.8 mmol) in MeOH (20 mL) and Pd/C (140 mg, 10 wt%), and the mixture was stirred under a  $\text{H}_2$  atmosphere at room temperature for 15 min. The reaction mixture was filtered through high-flow celite, and the filtrate was concentrated to afford the following compound **E** without further purification.

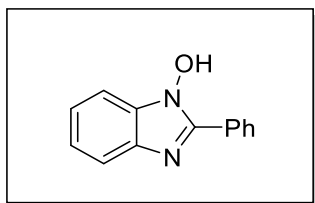

### 2-phenyl-1*H*-benzo[*d*]imidazol-1-ol

White solid (580 mg, 57% yield). m.p. 226-227 °C. <sup>1</sup>H NMR (400 MHz, DMSO-*d*<sub>6</sub>) δ 12.10 (s, 1H), 8.26 (d, *J* = 7.2 Hz, 2H), 7.67 (d, *J* = 7.6 Hz, 1H), 7.60 – 7.50 (m, 4H), 7.34 -7.21 (m, 2H). <sup>13</sup>C NMR (100 MHz, DMSO-*d*<sub>6</sub>) δ 146.9, 137.8, 133.5, 129.9, 128.8, 128.7, 128.2, 122.8, 122.2, 119.3, 109.2.

#### Procedure:

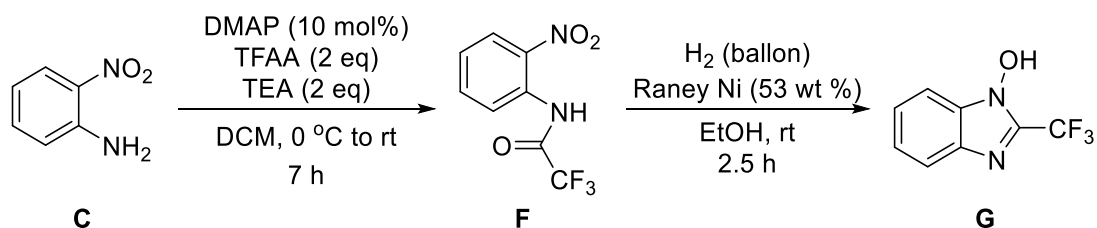

To a 250-mL round bottom flask equipped with a stir bar was added **C** (2.76 g, 20 mmol) in DCM (80 mL) at 0 °C and stirred for 30 min. To the solution was added 4-dimethylaminopyridine (244 mg, 2.0 mmol, 10 mol%), triethylamine (5.64 mL, 40 mmol, 2.0 equiv) and trifluoroacetic anhydride (5.64 mL, 40 mmol, 2.0 equiv), and the mixture was stirred at room temperature for 7 h. The reaction mixture was quenched with H<sub>2</sub>O and extracted with ethyl acetate for three times. The combined organic layer was dried over Na<sub>2</sub>SO<sub>4</sub> and concentrated. The crude product was purified by flash column chromatography on silica gel, eluting with Hexane/EtOAc (6:1).

To a 50-mL round bottom flask equipped with a stir bar was added **F** (1.17 g, 5.0 mmol) in EtOH (20 mL), and Raney-Ni (625 mg, 53 wt%). The mixture was stirred under a H<sub>2</sub> atmosphere at room temperature for 2.5 h. The reaction mixture was filtered through high-flow celite, and the filtrate was concentrated. The crude product was purified by flash column chromatography on silica gel, eluting with Hexane/EtOAc (3:1).

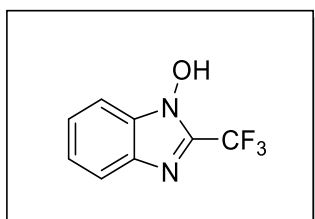

### 2-(trifluoromethyl)-1*H*-benzo[*d*]imidazol-1-ol

White solid (558 mg, 55% yield). m.p. 198-199 °C. <sup>1</sup>H NMR (400 MHz, MeOD-*d*<sub>4</sub>) δ 7.73 (d, *J* = 7.6 Hz, 1H), 7.61 (d, *J* = 8.0 Hz, 1H), 7.47 (t, *J* = 7.6 Hz, 1H), 7.39 (t, *J* = 7.6 Hz, 1H). <sup>13</sup>C NMR (100 MHz, MeOD-*d*<sub>4</sub>) δ 138.2 (q, *J*<sub>C-F</sub> = 39.5 Hz), 137.8, 134.0, 126.9, 125.1, 121.6, 119.9 (q, *J*<sub>C-F</sub> = 268.5 Hz), 110.9. <sup>19</sup>F NMR (376 MHz, MeOD-*d*<sub>4</sub>) δ -65.3.

#### Procedure:

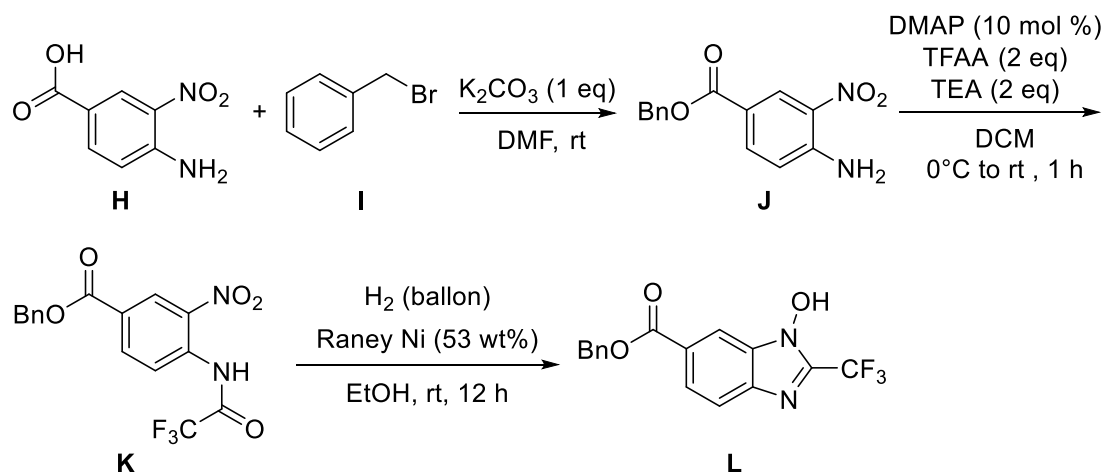

To a 50-mL round bottom flask equipped with a stir bar was added **H** (0.728 g, 4 mmol) and **I** (0.48 ml, 4 mmol) in DMF (20 mL). To the solution was added  $K_2CO_3$  (0.608g, 4 mmol), and the mixture was stirred at room temperature for 18 h. The reaction mixture was quenched with  $H_2O$  (125 mL) and extracted with ethyl acetate for three times. The combined organic layer was dried over  $Na_2SO_4$  and concentrated to afford the crude product **J**. The crude product was purified by flash column chromatography on silica gel, eluting with Hexane/EtOAc (6:1).

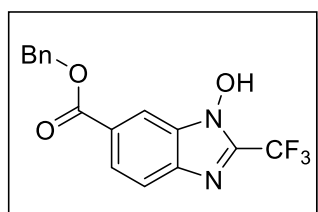

#### benzyl 1-hydroxy-2-(trifluoromethyl)-1H-benzo[d]imidazole-6-carboxylate

Yellow solid (532 mg, 75% yield).  $^1H$  NMR (400 MHz, MeOD- $d_4$ )  $\delta$  8.32 (s, 1H), 8.09 (d,  $J = 8.8$  Hz, 1H), 7.84 (d,  $J = 8.8$  Hz, 1H), 7.51 - 7.34 (m, 5H), 5.42 (s, 2H).  $^{13}C$  NMR (100 MHz, MeOD- $d_4$ )  $\delta$  167.1, 141.0, 140.7 (q,  $J_{C-F} = 35.7$  Hz), 137.4, 133.7, 129.6, 129.6, 129.3, 129.3, 129.2, 128.8, 125.8, 121.9, 119.6 (q,  $J_{C-F} = 269.2$  Hz), 113.3, 68.1.  $^{19}F$  NMR (376 MHz, MeOD- $d_4$ )  $\delta$  -65.6. HRMS (ESI):  $m/z$   $[M+H]^+$  calcd. for  $C_{16}H_{12}F_3N_2O_3$ : 337.0795; Found: 337.0799.

#### Procedure:

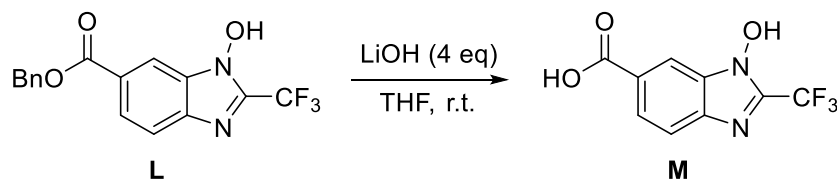

Dissolve **L** (322 mg, 1 mmol) in THF and LiOH (92 mg, 4 mmol) in water. Add the aqueous solution of LiOH to the solution of **L**, and the mixture was stirred at 30 °C for 4h. Then the reaction mixture was quenched with  $H_2O$  (1 mL) and extracted with ethyl acetate. The pH of water layer was adjusted to 3~4 with diluted hydrochloric acid, and extracted with ethyl acetate. The combined organic layer was dried over  $Na_2SO_4$  and concentrated to afford the product without further purification.

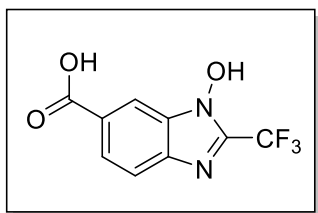

**2-(3-cyclohexylureido)phenyl 1-hydroxy-2-(trifluoromethyl)-1H-benzo[d]imidazole-6-carboxylate**

Yellow solid (558 mg, 70% yield).  $^1\text{H NMR}$  (400 MHz, MeOD- $d_4$ )  $\delta$  8.30 (s, 1H), 8.06 (d,  $J = 8.4$  Hz, 1H), 7.81 (d,  $J = 8.4$  Hz, 1H).  $^{13}\text{C NMR}$  (100 MHz, MeOD- $d_4$ )  $\delta$  169.2, 140.8, 140.5 (q,  $J_{\text{C-F}} = 39.6$  Hz), 133.7, 129.5, 126.1, 121.6, 119.6 (q,  $J_{\text{C-F}} = 269.1$  Hz), 113.4.  $^{19}\text{F NMR}$  (376 MHz, MeOD- $d_4$ )  $\delta$  -65.6. **HRMS** (ESI):  $m/z$   $[\text{M-H}]^-$  calcd. for  $\text{C}_9\text{H}_4\text{F}_3\text{N}_2\text{O}_3$ : 245.0180; Found: 245.0176.

**Procedure:**

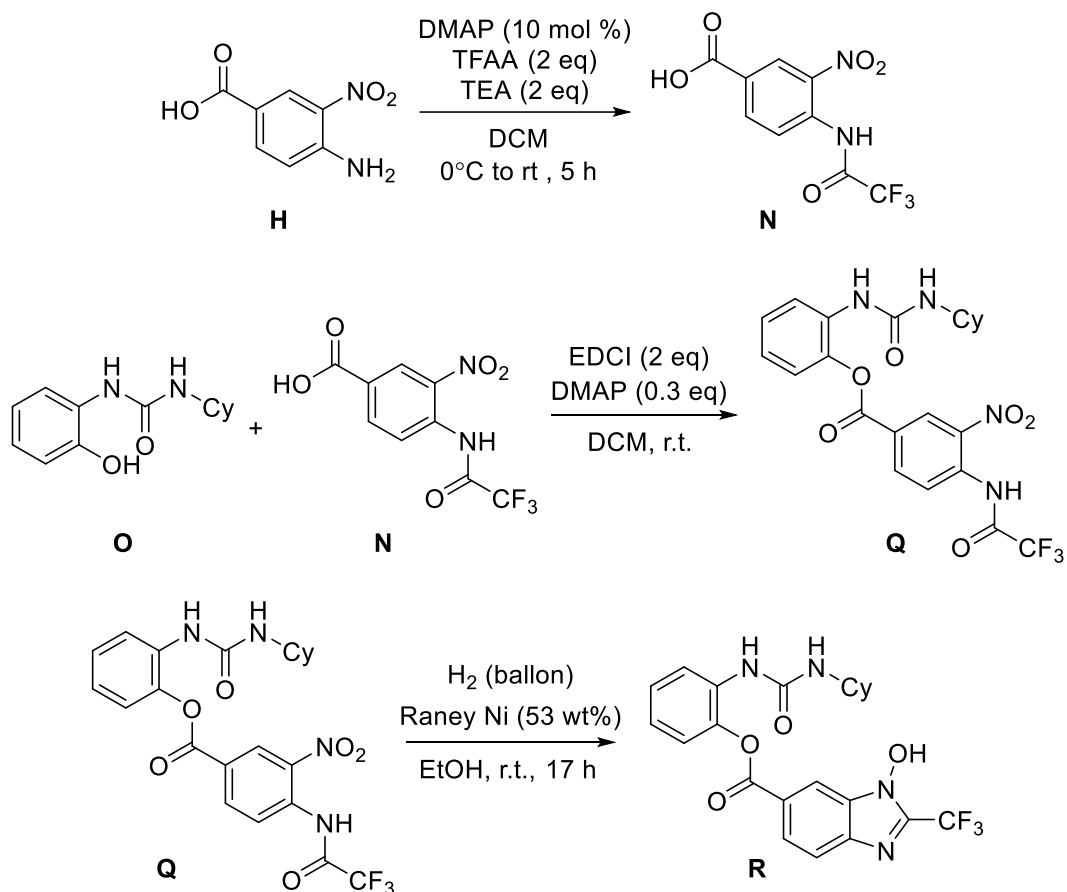

The procedure for the reaction from **H** to **N** and from **Q** to **R** was similar to that of the previous routes. The procedure for the synthesis of **Q**: To a 50-mL round bottom flask equipped with a stir bar was added **N** (0.83g, 3.0 mmol), EDCI (1.14g, 5.9 mmol) and DMAP (0.11g, 0.89 mmol) in DMF (15 mL), which was stirred for 3 minutes. To the solution was added **O** (0.70g, 3.0 mmol), and the mixture was stirred at room temperature for 5 h. The reaction mixture was quenched with  $\text{H}_2\text{O}$  and extracted with ethyl acetate for three times. The combined organic layer was dried over  $\text{Na}_2\text{SO}_4$  and

concentrated. The residue was purified by flash column chromatography on silica gel (PE:EA = 3:1) to afford the following compound.

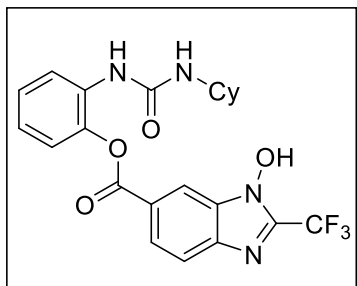

**2-(3-cyclohexylureido)phenyl 1-hydroxy-2-(trifluoromethyl)-1H-benzo[d]imidazole-6-carboxylate**

Yellow solid (170 mg, 24% yield).  $^1\text{H NMR}$  (400 MHz, MeOD- $d_4$ )  $\delta$  8.20 (s, 1H), 8.10 (d,  $J = 8.0$  Hz, 1H), 7.90 (d,  $J = 8.4$  Hz, 1H), 7.56 (d,  $J = 8.8$  Hz, 1H), 7.22 (t,  $J = 8.0$  Hz, 1H), 7.14 (d,  $J = 7.6$  Hz, 1H), 7.06 (t,  $J = 7.6$  Hz, 1H), 3.56 – 3.48 (m, 1H), 1.82 (d,  $J = 12.0$  Hz, 2H), 1.65 – 1.56 (m, 2H), 1.55 – 1.46 (m, 1H), 1.34 – 1.24 (m, 2H), 1.15 - 1.03 (m, 3H).  $^{13}\text{C NMR}$  (100 MHz, MeOD- $d_4$ )  $\delta$  166.3, 157.2, 141.9, 141.3, 140.7 (q,  $J_{\text{C-F}} = 38.1$  Hz), 134.5, 133.5, 127.3, 125.4, 125.2, 123.6, 122.5, 120.6, 120.5 (q,  $J_{\text{C-F}} = 268.6$  Hz), 114.7, 49.6, 34.3, 26.6, 25.7.  $^{19}\text{F NMR}$  (376 MHz, MeOD- $d_4$ )  $\delta$  -65.5. **HRMS** (ESI):  $m/z$   $[\text{M-H}]^-$  calcd. for  $\text{C}_{22}\text{H}_{20}\text{F}_3\text{N}_4\text{O}_4$ : 461.1142; Found: 461.1440.

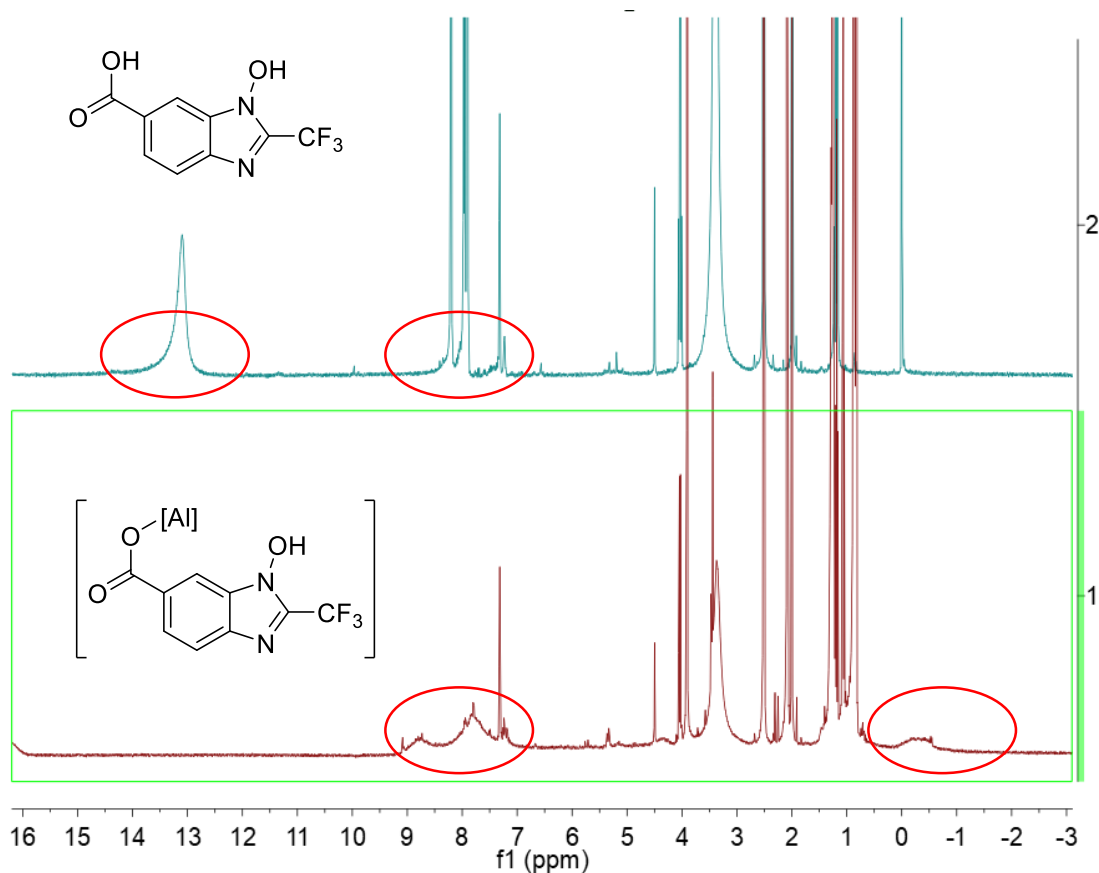

**Figure S1.**  $^1\text{H NMR}$  (DMSO- $d_6$ ) comparison of **NHBI-5** (top) and **NHBI-6** (premixed **NHBI-5**/ $\text{AlEt}_3$  (1/1)) (bottom).



## 4 Typical Procedure for Cu/N-Hydroxy Catalyzed Annulation

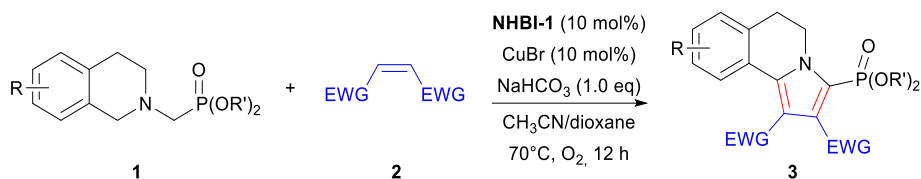

According to the general procedure, **1** (1 mmol), **2** (0.50 mmol), **NaHCO<sub>3</sub>** (0.5 mmol), **CuBr** (10 mol%), **NHBI-1** (10 mol%) and solvent (4 mL, **CH<sub>3</sub>CN**:1,4-dioxane = 3:1) were added into sealed tube under oxygen atmosphere, and the mixture was stirred at 70 °C for 12 h. After the reaction, the mixture was filtered and purified by column chromatography (eluting with Hexane/EtOAc) to give **3** as the product.

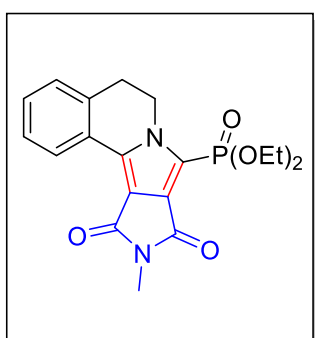

### diethyl (10-methyl-9,11-dioxo-5,9,10,11-tetrahydro-6H-pyrrolo[3',4':3,4]pyrrolo[2,1-a]isoquinolin-8-yl)phosphonate

Yellow solid (162 mg, 80% yield). m.p. 136-137 °C. <sup>1</sup>H NMR (400 MHz, CDCl<sub>3</sub>) δ 8.49 (d, *J* = 8.5 Hz, 1H), 7.42 (t, *J* = 7.4 Hz, 1H), 7.36 (t, *J* = 7.4 Hz, 1H), 7.27 (d, *J* = 6.8 Hz, 1H), 4.60 (t, *J* = 6.8 Hz, 2H), 4.31 – 4.21 (m, 4H), 3.16 (t, *J* = 6.8 Hz, 2H), 3.12 (s, 3H), 1.41 (t, *J* = 7.2 Hz, 6H). <sup>13</sup>C NMR (100 MHz, CDCl<sub>3</sub>) δ 164.1, 163.1, 133.5 (d, <sup>3</sup>*J*<sub>C-P</sub> = 9.2 Hz), 132.2, 130.0, 128.2 (d, <sup>2</sup>*J*<sub>C-P</sub> = 15.4 Hz), 128.0, 127.7, 127.6, 125.7, 117.6 (d, <sup>1</sup>*J*<sub>C-P</sub> = 222.2 Hz), 116.9 (d, <sup>3</sup>*J*<sub>C-P</sub> = 10.4 Hz), 63.6 (d, <sup>2</sup>*J*<sub>C-P</sub> = 7.0 Hz), 44.1, 28.5, 24.2, 16.3 (d, <sup>3</sup>*J*<sub>C-P</sub> = 6.5 Hz). <sup>31</sup>P NMR (162 MHz, CDCl<sub>3</sub>) δ 3.51.

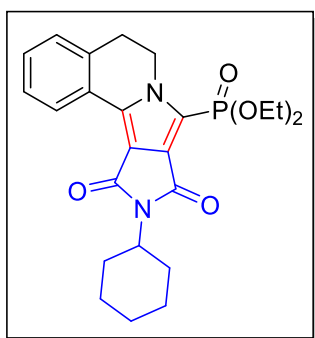

### Diethyl (10-cyclohexyl-9,11-dioxo-5,9,10,11-tetrahydro-6H-pyrrolo[3',4':3,4]pyrrolo[2,1-a]isoquinolin-8-yl)phosphonate

Yellow solid (146 mg, 65% yield). m.p. 198-199 °C. <sup>1</sup>H NMR (400 MHz, CDCl<sub>3</sub>) δ 8.51 (d, *J* = 7.6 Hz, 1H), 7.40 (t, *J* = 6.4 Hz, 1H), 7.35 (t, *J* = 7.2 Hz, 1H), 7.25 (d, *J* = 5.2 Hz, 1H), 4.58 (t, *J* = 6.8 Hz, 2H), 4.34 – 4.20 (m, 4H), 4.08 – 4.00 (m, 1H), 3.15 (t,

$J = 6.8$  Hz, 2H), 2.23 (q,  $J = 12.4, 11.0$  Hz, 2H), 1.85 (d,  $J = 13.1$  Hz, 2H), 1.78 – 1.64 (m, 3H), 1.40 (t,  $J = 7.1$  Hz, 6H), 1.34– 1.23 (m, 3H).  $^{13}\text{C}$  NMR (100 MHz,  $\text{CDCl}_3$ )  $\delta$  164.4, 163.0, 133.4 (d,  $^3J_{\text{C-P}} = 9.2$  Hz), 132.3, 130.0, 128.2 (d,  $^2J_{\text{C-P}} = 15.5$  Hz), 128.0, 127.7, 125.9, 117.4 (d,  $^1J_{\text{C-P}} = 222.8$  Hz), 117.1 (d,  $^3J_{\text{C-P}} = 10.3$  Hz), 63.6 (d,  $^2J_{\text{C-P}} = 6.0$  Hz), 51.1, 44.2, 30.0, 28.6, 26.3, 25.3, 16.4 (d,  $^3J_{\text{C-P}} = 6.5$  Hz).  $^{31}\text{P}$  NMR (162 MHz,  $\text{CDCl}_3$ )  $\delta$  3.79.

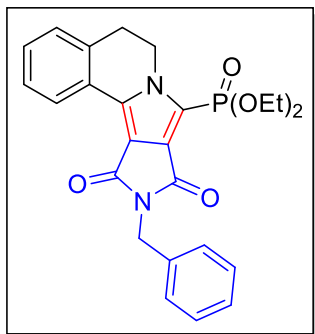

**diethyl (10-benzyl-9,11-dioxo-5,9,10,11-tetrahydro-6H-pyrrolo[3',4':3,4]pyrrolo[2,1-a]isoquinolin-8-yl)phosphonate**

Yellow solid (186 mg, 79% yield). m.p. 149-150 °C.  $^1\text{H}$  NMR (400 MHz,  $\text{CDCl}_3$ )  $\delta$  8.49 (d,  $J = 7.2$  Hz, 1H), 7.50 – 7.22 (m, 8H), 4.79 (s, 2H), 4.58 (t,  $J = 6.4$  Hz, 2H), 4.35 – 4.19 (m, 4H), 3.15 (t,  $J = 6.4$  Hz, 2H), 1.42 (t,  $J = 6.8$  Hz, 6H).  $^{13}\text{C}$  NMR (100 MHz,  $\text{CDCl}_3$ )  $\delta$  163.8, 162.7, 137.2, 133.7 (d,  $^3J_{\text{C-P}} = 9.2$  Hz), 132.3, 130.1, 128.6, 128.2, 128.0, 127.7, 127.7, 127.6, 125.7, 117.9 (d,  $^1J_{\text{C-P}} = 233.7$  Hz), 116.8, 63.7 (d,  $^2J_{\text{C-P}} = 5.9$  Hz), 44.2, 41.8, 28.5, 16.4 (d,  $^3J_{\text{C-P}} = 6.4$  Hz).  $^{31}\text{P}$  NMR (162 MHz,  $\text{CDCl}_3$ )  $\delta$  3.57.

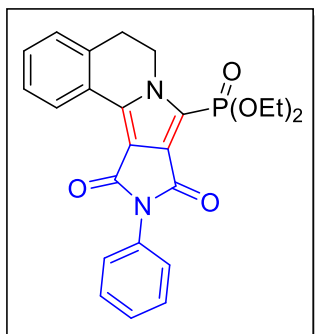

**diethyl (9,11-dioxo-10-phenyl-5,9,10,11-tetrahydro-6H-pyrrolo[3',4':3,4]pyrrolo[2,1-a]isoquinolin-8-yl)phosphonate**

Yellow solid (162 mg, 72% yield). m.p. 189-190 °C.  $^1\text{H}$  NMR (400 MHz,  $\text{CDCl}_3$ )  $\delta$  8.56 (d,  $J = 8.8$  Hz, 1H), 7.52 – 7.45 (m, 2H), 7.44 – 7.34 (m, 5H), 7.29 (d,  $J = 7.2$  Hz, 1H), 4.66 (t,  $J = 6.8$  Hz, 2H), 4.34 – 4.25 (m, 4H), 3.20 (t,  $J = 6.8$  Hz, 2H), 1.41 (t,  $J = 7.2$  Hz, 6H).  $^{13}\text{C}$  NMR (100 MHz,  $\text{CDCl}_3$ )  $\delta$  163.1, 162.0, 134.2 (d,  $^3J_{\text{C-P}} = 9.3$  Hz), 132.6, 132.4, 130.3, 129.0, 128.1, 127.8, 127.8, 127.6 (d,  $^2J_{\text{C-P}} = 15.2$  Hz), 127.1, 125.7, 118.5 (d,  $^1J_{\text{C-P}} = 222.4$  Hz), 116.5 (d,  $^2J_{\text{C-P}} = 10.2$  Hz), 63.8 (d,  $^2J_{\text{C-P}} = 6.1$  Hz), 44.4, 28.6, 16.4 (d,  $^3J_{\text{C-P}} = 6.4$  Hz).  $^{31}\text{P}$  NMR (162 MHz,  $\text{CDCl}_3$ )  $\delta$  3.28.

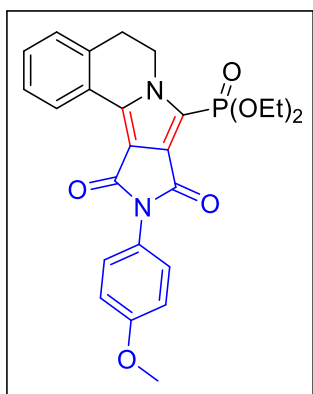

**diethyl (10-(4-methoxyphenyl)-9,11-dioxo-5,9,10,11-tetrahydro-6H-pyrrolo[3',4':3,4]pyrrolo[2,1-a]isoquinolin-8-yl)phosphonate**

Yellow solid (161 mg, 67% yield). m.p. 173-174 °C.  $^1\text{H NMR}$  (400 MHz,  $\text{CDCl}_3$ )  $\delta$  8.58 (d,  $J = 7.2$  Hz, 1H), 7.46 – 7.36 (m, 2H), 7.35 – 7.27 (m, 3H), 7.03 (d,  $J = 9.2$  Hz, 2H), 4.68 (t,  $J = 6.8$  Hz, 2H), 4.39 – 4.19 (m, 4H), 3.87 (s, 3H), 3.22 (t,  $J = 6.4$  Hz, 2H), 1.47 – 1.39 (m, 6H).  $^{13}\text{C NMR}$  (100 MHz,  $\text{CDCl}_3$ )  $\delta$  163.4, 162.3, 159.1, 134.1 (d,  $^3J_{\text{C-P}} = 9.2$  Hz), 132.4, 130.2, 128.4, 128.1, 127.8, 127.8, 127.6 (d,  $^2J_{\text{C-P}} = 15.4$  Hz), 125.7, 125.3, 118.4 (d,  $^1J_{\text{C-P}} = 222.5$  Hz), 116.6 (d,  $^3J_{\text{C-P}} = 10.3$  Hz), 114.3, 63.8 (d,  $^2J_{\text{C-P}} = 6.1$  Hz), 55.6, 44.4, 28.6, 16.4 (d,  $^3J_{\text{C-P}} = 6.5$  Hz).  $^{31}\text{P NMR}$  (162 MHz,  $\text{CDCl}_3$ )  $\delta$  3.37.

**HRMS** (ESI):  $m/z$   $[\text{M}+\text{H}]^+$  calcd. for  $\text{C}_{25}\text{H}_{26}\text{N}_2\text{O}_6\text{P}$ : 481.1523; Found: 481.1523.

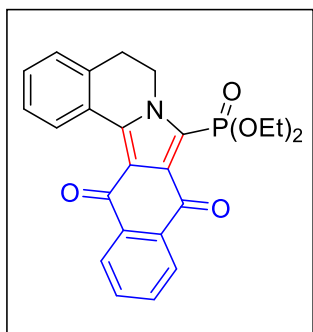

**diethyl (9,14-dioxo-5,6,9,14-tetrahydrobenzo[5,6]isoindolo[1,2-a]isoquinolin-8-yl)phosphonate**

Yellow solid (127 mg, 58% yield). m.p. 162-163 °C.  $^1\text{H NMR}$  (400 MHz,  $\text{CDCl}_3$ )  $\delta$  8.91 (d,  $J = 7.8$  Hz, 1H), 8.34 – 8.25 (m, 2H), 7.78 – 7.72 (m, 2H), 7.50 – 7.40 (m, 2H), 7.32 (d,  $J = 7.2$  Hz, 1H), 4.88 (t,  $J = 6.4$  Hz, 2H), 4.42 – 4.22 (m, 4H), 3.10 (t,  $J = 6.4$  Hz, 2H), 1.39 (t,  $J = 6.8$  Hz, 6H).  $^{13}\text{C NMR}$  (100 MHz,  $\text{CDCl}_3$ )  $\delta$  179.9, 179.4, 138.7 (d,  $^3J_{\text{C-P}} = 10.6$  Hz), 135.4, 134.8, 134.7, 133.4, 133.1, 130.3, 129.5 (d,  $^2J_{\text{C-P}} = 13.5$  Hz), 129.1, 127.3, 127.2, 127.1, 126.8, 126.5, 122.2 (d,  $^1J_{\text{C-P}} = 217.7$  Hz), 119.0 (d,  $^3J_{\text{C-P}} = 9.7$  Hz), 63.6 (d,  $^2J_{\text{C-P}} = 5.8$  Hz), 44.2, 29.6, 16.4 (d,  $^3J_{\text{C-P}} = 6.6$  Hz).  $^{31}\text{P NMR}$  (162 MHz,  $\text{CDCl}_3$ )  $\delta$  5.22.

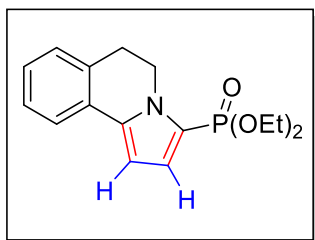

**diethyl (5,6-dihydropyrrolo[2,1-a]isoquinolin-3-yl)phosphonate**

Yellow oil (97mg, 63% yield).  $^1\text{H NMR}$  (400 MHz,  $\text{CDCl}_3$ )  $\delta$  7.55 (d,  $J = 7.6$  Hz, 1H), 7.28 – 7.25 (m, 1H), 7.24 – 7.16 (m, 2H), 6.86 (t,  $J = 3.6$  Hz, 1H), 6.55 (t,  $J = 4.0$  Hz, 1H), 4.34 (t,  $J = 6.8$  Hz, 2H), 4.21 – 4.05 (m, 4H), 3.09 (t,  $J = 6.8$  Hz, 2H), 1.33 (t,  $J = 7.2$  Hz, 6H).  $^{13}\text{C NMR}$  (100 MHz,  $\text{CDCl}_3$ )  $\delta$  136.3 (d,  $^3J_{\text{C-P}} = 11.6$  Hz), 131.2, 128.5, 128.0, 127.2 (d,  $^2J_{\text{C-P}} = 4.5$  Hz), 123.5, 121.7, 121.5, 118.3 (d,  $^1J_{\text{C-P}} = 226.5$  Hz), 104.3 (d,  $^3J_{\text{C-P}} = 13.7$  Hz), 62.3 (d,  $^2J_{\text{C-P}} = 5.1$  Hz), 43.1, 29.1, 16.4 (d,  $^3J_{\text{C-P}} = 6.6$  Hz).  $^{31}\text{P NMR}$  (162 MHz,  $\text{CDCl}_3$ )  $\delta$  10.17. **HRMS** (ESI):  $m/z$   $[\text{M}+\text{Na}]^+$  calcd. for  $\text{C}_{19}\text{H}_{20}\text{NO}_3\text{PNa}$ : 328.1073; Found: 328.1072.

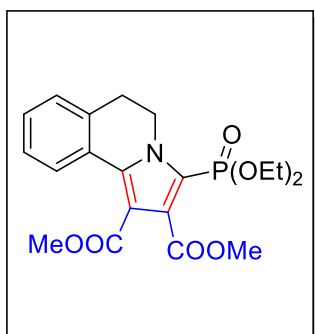

**dimethyl 3-(diethoxyphosphoryl)-5,6-dihydropyrrolo[2,1-a]isoquinoline-1,2-dicarboxylate**

Yellow solid (121 mg, 54% yield). m.p. 120-121 °C.  $^1\text{H NMR}$  (400 MHz,  $\text{CDCl}_3$ )  $\delta$  8.17 (d,  $J = 8.8$  Hz, 1H), 7.36 – 7.28 (m, 2H), 7.25 – 7.23 (m, 1H), 4.37 (t,  $J = 6.4$  Hz, 2H), 4.26 – 4.06 (m, 4H), 3.91 (s, 3H), 3.83 (s, 3H), 3.03 (t,  $J = 6.4$  Hz, 2H), 1.33 (t,  $J = 7.2$  Hz, 6H).  $^{13}\text{C NMR}$  (100 MHz,  $\text{CDCl}_3$ )  $\delta$  166.2, 164.2, 136.8 (d,  $^3J_{\text{C-P}} = 10.0$  Hz), 133.8, 129.6 (d,  $^2J_{\text{C-P}} = 15.9$  Hz), 129.2, 128.0, 127.5, 127.2, 126.6, 117.6 (d,  $^1J_{\text{C-P}} = 221.3$  Hz), 111.1 (d,  $^3J_{\text{C-P}} = 6.5$  Hz), 63.0 (d,  $^2J_{\text{C-P}} = 5.3$  Hz), 52.6, 51.9, 43.7, 29.5, 16.2 (d,  $^3J_{\text{C-P}} = 6.6$  Hz).  $^{31}\text{P NMR}$  (162 MHz,  $\text{CDCl}_3$ )  $\delta$  5.85.

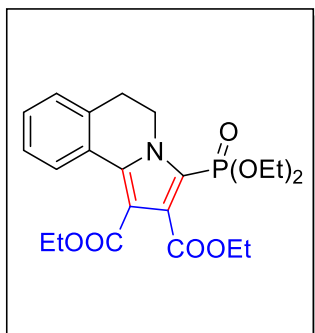

**diethyl 3-(diethoxyphosphoryl)-5,6-dihydropyrrolo[2,1-a]isoquinoline-1,2-dicarboxylate**

Yellow solid (124 mg, 55% yield). m.p. 62-63 °C.  $^1\text{H NMR}$  (400 MHz,  $\text{CDCl}_3$ )  $\delta$  8.22 (d,  $J = 7.6$  Hz, 1H), 7.37 – 7.29 (m, 2H), 7.28 – 7.24 (m, 1H), 4.41 – 4.30 (m, 6H), 4.27 – 4.07 (m, 4H), 3.04 (t,  $J = 6.4$  Hz, 2H), 1.44 – 1.31 (m, 12H).  $^{13}\text{C NMR}$  (100 MHz,  $\text{CDCl}_3$ )  $\delta$  165.7, 163.8, 136.7 (d,  $^3J_{\text{C-P}} = 10.1$  Hz), 133.8, 129.8 (d,  $J = 16.0$  Hz), 129.1, 128.1, 127.5, 127.1, 126.7, 117.4 (d,  $^1J_{\text{C-P}} = 221.2$  Hz), 111.4 (d,  $^3J_{\text{C-P}} = 11.7$  Hz), 62.9 (d,  $^2J_{\text{C-P}} = 5.2$  Hz), 61.5, 60.8, 43.6, 29.5, 16.3 (d,  $^3J_{\text{C-P}} = 6.6$  Hz), 14.1, 14.1.  $^{31}\text{P NMR}$  (162 MHz,  $\text{CDCl}_3$ )  $\delta$  6.10.

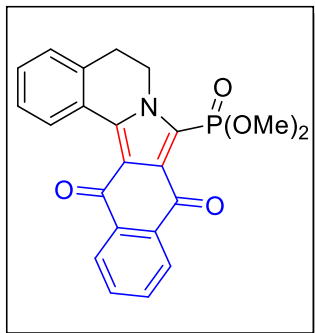

**dimethyl (9,14-dioxo-5,6,9,14-tetrahydrobenzo[5,6]isoindolo[1,2-a]isoquinolin-8-yl)phosphonate**

Yellow solid (168 mg, 82% yield). m.p. 178-179 °C.  $^1\text{H NMR}$  (400 MHz,  $\text{CDCl}_3$ )  $\delta$  8.88 (d,  $J = 7.6$  Hz, 1H), 8.31– 8.24 (m, 2H), 7.77– 7.69 (m, 2H), 7.48 – 7.39 (m, 2H), 7.30 (d,  $J = 7.2$  Hz, 1H), 4.86 (t,  $J = 6.4$  Hz, 2H), 3.95 (d,  $J = 12.0$  Hz, 6H), 3.09 (t,  $J = 6.4$  Hz, 2H).  $^{13}\text{C NMR}$  (100 MHz,  $\text{CDCl}_3$ )  $\delta$  179.7, 179.5, 139.0 (d,  $^3J_{\text{C-P}} = 10.8$  Hz), 135.4, 134.7, 134.5, 133.5, 133.1, 130.3, 129.7 (d,  $^2J_{\text{C-P}} = 13.8$  Hz), 129.0, 127.2, 127.2, 127.1, 126.8, 126.3, 120.6 (d,  $^1J_{\text{C-P}} = 220.3$  Hz), 119.0 (d,  $^3J_{\text{C-P}} = 9.8$  Hz), 53.8 (d,  $^2J_{\text{C-P}} = 5.8$  Hz), 44.2, 29.5.  $^{31}\text{P NMR}$  (162 MHz,  $\text{CDCl}_3$ )  $\delta$  8.43.

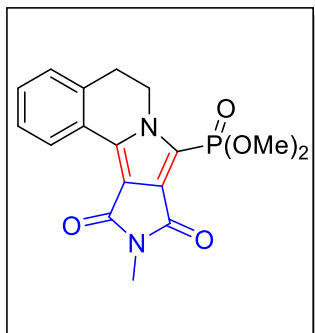

**dimethyl (10-methyl-9,11-dioxo-5,9,10,11-tetrahydro-6H-pyrrolo[3',4':3,4]pyrrolo[2,1-a]isoquinolin-8-yl)phosphonate**

Yellow solid (102 mg, 56% yield). m.p. 165-166 °C.  $^1\text{H NMR}$  (400 MHz,  $\text{CDCl}_3$ )  $\delta$  8.51 (d,  $J = 7.6$  Hz, 1H), 7.44 – 7.35 (m, 2H), 7.31 - 7.26 (m, 1H), 4.60 (t,  $J = 6.8$  Hz, 2H), 3.93 (d,  $J = 11.6$  Hz, 6H), 3.19 (t,  $J = 6.8$  Hz, 2H), 3.15 (s, 3H).  $^{13}\text{C NMR}$  (100 MHz,  $\text{CDCl}_3$ )  $\delta$  164.0, 163.1, 133.9 (d,  $^3J_{\text{C-P}} = 9.2$  Hz), 132.3, 130.2, 128.6 (d,  $^2J_{\text{C-P}} = 15.4$  Hz), 128.0, 127.8, 127.7, 125.6, 116.9 (d,  $^3J_{\text{C-P}} = 10.5$  Hz), 116.2 (d,  $^1J_{\text{C-P}} = 223.8$  Hz), 53.9 (d,  $^2J_{\text{C-P}} = 6.1$  Hz), 44.2, 28.5, 24.3.  $^{31}\text{P NMR}$  (162 MHz,  $\text{CDCl}_3$ )  $\delta$  6.47.

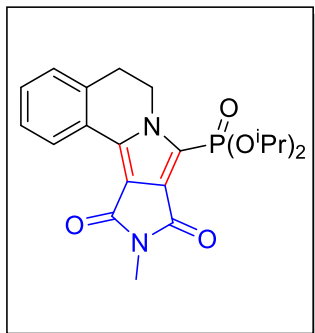

**diisopropyl (10-methyl-9,11-dioxo-5,9,10,11-tetrahydro-6H-pyrrolo[3',4':3,4]pyrrolo[2,1-a]isoquinolin-8-yl)phosphonate**

Yellow solid (159 mg, 76% yield). m.p. 148-149 °C.  $^1\text{H NMR}$  (400 MHz,  $\text{CDCl}_3$ )  $\delta$  8.52 (d,  $J = 7.6$  Hz, 1H), 7.44 (t,  $J = 7.6$  Hz, 1H), 7.37 (t,  $J = 7.2$  Hz, 1H), 7.31 - 7.26 (m, 1H), 4.87- 4.79 (m, 2H), 4.64 (t,  $J = 6.4$  Hz, 2H), 3.17 (t,  $J = 6.8$  Hz, 2H), 3.14 (s, 3H), 1.41 (d,  $J = 6.0$  Hz, 6H), 1.37 (d,  $J = 6.0$  Hz, 6H).  $^{13}\text{C NMR}$  (100 MHz,  $\text{CDCl}_3$ )  $\delta$  164.3, 163.0, 133.1 (d,  $^3J_{\text{C-P}} = 9.3$  Hz), 132.3, 130.0, 128.2 (d,  $^2J_{\text{C-P}} = 15.2$  Hz), 128.0, 127.7, 127.7, 125.9, 119.3 (d,  $^1J_{\text{C-P}} = 223.6$  Hz), 117.1 (d,  $^3J_{\text{C-P}} = 10.2$  Hz), 72.7 (d,  $^2J_{\text{C-P}} = 6.1$  Hz), 44.1, 28.6, 24.3, 24.0 (d,  $^3J_{\text{C-P}} = 4.7$  Hz), 23.9 (d,  $^3J_{\text{C-P}} = 4.4$  Hz).  $^{31}\text{P NMR}$  (162 MHz,  $\text{CDCl}_3$ )  $\delta$  0.87.

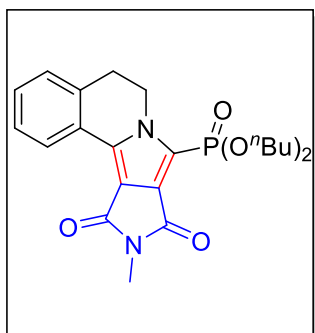

**dibutyl (10-methyl-9,11-dioxo-5,9,10,11-tetrahydro-6H-pyrrolo[3',4':3,4]pyrrolo[2,1-a]isoquinolin-8-yl)phosphonate**

Yellow solid (155 mg, 69% yield). m.p. 104-105 °C.  $^1\text{H NMR}$  (400 MHz,  $\text{CDCl}_3$ )  $\delta$  8.50 (d,  $J = 7.6$  Hz, 1H), 7.42 (t,  $J = 7.2$  Hz, 1H), 7.36 (t,  $J = 7.2$  Hz, 1H), 7.29 - 7.25 (m, 1H), 4.59 (t,  $J = 6.8$  Hz, 2H), 4.26 - 4.09 (m, 4H), 3.16 (t,  $J = 6.8$  Hz, 2H), 3.12 (s, 3H), 1.77 - 1.70 (m, 4H), 1.47 - 1.37 (m, 4H), 0.94 (t,  $J = 7.6$  Hz, 6H).  $^{13}\text{C NMR}$  (100 MHz,  $\text{CDCl}_3$ )  $\delta$  164.2, 163.2, 133.6 (d,  $^3J_{\text{C-P}} = 9.2$  Hz), 132.3, 130.1, 128.3 (d,  $^2J_{\text{C-P}} = 15.4$  Hz), 128.0, 127.8, 127.7, 125.8, 117.7 (d,  $^1J_{\text{C-P}} = 222.4$  Hz), 117.0 (d,  $^3J_{\text{C-P}} = 10.4$  Hz), 67.3 (d,  $^2J_{\text{C-P}} = 6.3$  Hz), 44.2, 32.4 (d,  $^3J_{\text{C-P}} = 6.4$  Hz), 28.6, 24.3, 18.8, 13.7.  $^{31}\text{P NMR}$  (162 MHz,  $\text{CDCl}_3$ )  $\delta$  3.72.

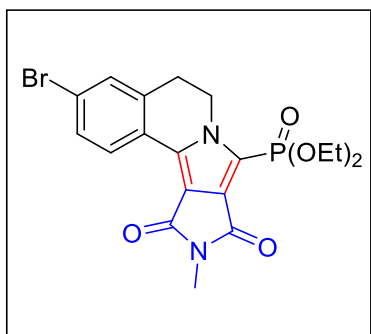

**diethyl (3-bromo-10-methyl-9,11-dioxo-5,9,10,11-tetrahydro-6H-pyrrolo[3',4':3,4]pyrrolo[2,1-a]isoquinolin-8-yl)phosphonate**

Yellow solid (171 mg, 72% yield). m.p. 177-178 °C.  $^1\text{H NMR}$  (400 MHz,  $\text{CDCl}_3$ )  $\delta$  8.39 (d,  $J = 8.4$  Hz, 1H), 7.56 (d,  $J = 8.4$  Hz, 1H), 7.46 (s, 1H), 4.60 (t,  $J = 6.8$  Hz, 2H), 4.32 – 4.19 (m, 4H), 3.17 (t,  $J = 6.8$  Hz, 2H), 3.13 (s, 3H), 1.42 (t,  $J = 7.2$  Hz, 6H).  $^{13}\text{C NMR}$  (100 MHz,  $\text{CDCl}_3$ )  $\delta$  164.1, 163.1, 134.1, 132.5 (d,  $^3J_{\text{C-P}} = 9.4$  Hz), 131.3, 130.9, 129.1, 128.3 (d,  $J = 15.0$  Hz), 124.7, 124.0, 118.1 (d,  $^1J_{\text{C-P}} = 221.9$  Hz), 117.3 (d,  $^2J_{\text{C-P}} = 10.4$  Hz), 63.8 (d,  $^2J_{\text{C-P}} = 6.1$  Hz), 43.9, 28.4, 24.4, 16.4 (d,  $^3J_{\text{C-P}} = 6.6$  Hz).  $^{31}\text{P NMR}$  (162 MHz,  $\text{CDCl}_3$ )  $\delta$  3.22. **HRMS** (ESI):  $m/z$   $[\text{M}+\text{Na}]^+$  calcd. for  $\text{C}_{19}\text{H}_{20}\text{N}_2\text{O}_5\text{PNa}$ : 489.0186; Found: 489.0188.

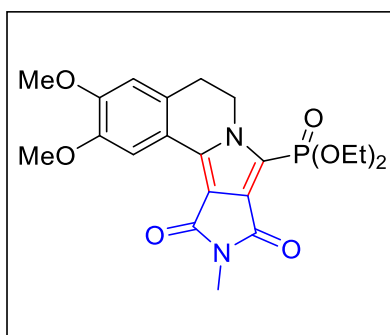

**diethyl (2,3-dimethoxy-10-methyl-9,11-dioxo-5,9,10,11-tetrahydro-6H-pyrrolo[3',4':3,4]pyrrolo[2,1-a]isoquinolin-8-yl)phosphonate**

Yellow solid (115 mg, 52% yield). m.p. 195-196 °C.  $^1\text{H NMR}$  (400 MHz,  $\text{CDCl}_3$ )  $\delta$  8.17 (s, 1H), 6.74 (s, 1H), 4.55 (t,  $J = 6.8$  Hz, 2H), 4.32 – 4.19 (m, 4H), 4.02 (s, 3H), 3.93 (s, 3H), 3.13 – 3.07 (m, 5H), 1.40 (t,  $J = 7.2$  Hz, 6H).  $^{13}\text{C NMR}$  (100 MHz,  $\text{CDCl}_3$ )  $\delta$  164.7, 163.3, 150.6, 148.7, 134.3 (d,  $^3J_{\text{C-P}} = 9.5$  Hz), 128.1 (d,  $^2J_{\text{C-P}} = 15.0$  Hz), 125.5, 118.5, 116.2, 115.6 (d,  $J = 10.2$  Hz), 110.4, 110.4, 63.7 (d,  $^2J_{\text{C-P}} = 5.9$  Hz), 56.2, 56.1, 44.4, 28.2, 24.2, 16.4 (d,  $^3J_{\text{C-P}} = 6.5$  Hz).  $^{31}\text{P NMR}$  (162 MHz,  $\text{CDCl}_3$ )  $\delta$  3.65.

## 5 Mechanistic Experiments

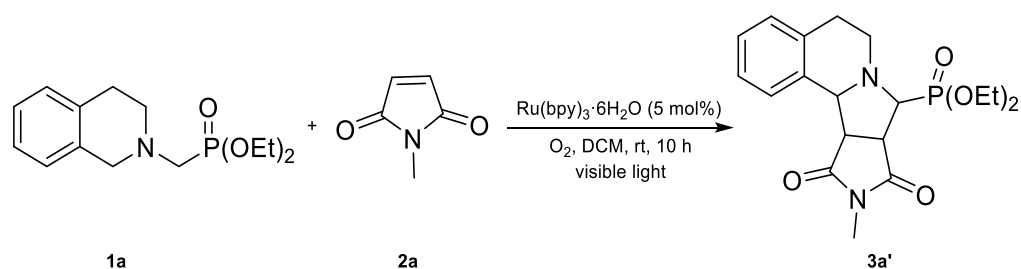

Synthesis of **3a'**: To a tube equipped with a stir bar was added **1a** (0.48 mmol, 1.2 equiv) and *N*-methylmaleimide (0.4 mmol, 1.0 equiv) in DCM (2 mL), then  $\text{Ru}(\text{bpy})_3 \cdot 6\text{H}_2\text{O}$  (5 mol %) (12.5 mmol, 0.40 g) was introduced. The mixture was reacted for 10 hours at room temperature under oxygen condition and visible light. After the solvent was removed under reduced pressure. The crude product was purified by flash column chromatography on silica gel, eluting with Hexane/EtOAc (1:1). The pure product was obtained as yellow oil (27 mg, 17% yield). Yellow oil (27 mg, 17% yield).  $^1\text{H NMR}$  (400 MHz,  $\text{CDCl}_3$ )  $\delta$  7.41 (d,  $J = 7.6$  Hz, 1H), 7.26 (t,  $J = 7.0$  Hz, 1H), 7.20 (t,  $J = 7.4$  Hz, 1H), 7.10 (d,  $J = 7.5$  Hz, 1H), 5.06 (d,  $J = 8.1$  Hz, 1H), 4.17 – 4.31 (m, 4H), 3.86 (d,  $J = 12.0$  Hz, 1H), 3.77 (t,  $J = 8.1$  Hz, 1H), 3.63 (dd,  $J = 16.1, 8.8$  Hz, 1H), 2.96 – 3.07 (m, 1H), 2.87– 2.95 (m, 1H), 2.86 (s, 1H), 2.83 (s, 3H), 2.69 – 2.80 (m, 1H), 1.39 (dt,  $J = 15.2, 7.1$  Hz, 6H).  $^{13}\text{C NMR}$  (100 MHz,  $\text{CDCl}_3$ )  $\delta$  178.4 (d,  $^3J_{\text{C-P}} = 15.7$  Hz), 178.3, 175.9, 133.8, 131.6, 128.7, 128.5, 126.8, 125.4, 64.3 (d,  $^1J_{\text{C-P}} = 172.0$  Hz), 63.5 (d,  $^2J_{\text{C-P}} = 4.0$  Hz), 63.4, 62.3 (d,  $^3J_{\text{C-P}} = 7.6$  Hz), 48.7, 48.1 (d,  $^3J_{\text{C-P}} = 11.7$  Hz), 46.9 (d,  $^2J_{\text{C-P}} = 4.2$  Hz) 30.2, 25.3, 16.6, 16.6 (d,  $^3J_{\text{C-P}} = 10.5$  Hz).  $^{31}\text{P NMR}$  (162 MHz,  $\text{CDCl}_3$ )  $\delta$  22.45. **HRMS** (ESI):  $m/z$   $[\text{M}+\text{H}]^+$  calcd. for  $\text{C}_{19}\text{H}_{26}\text{N}_2\text{O}_5\text{P}$ : 393.1574; Found: 393.1573.

The proposed intermediate **3a'** was subjected into standard conditions, or in the absence of NHBI, Cu salt,  $\text{O}_2$ , according to the typical procedure for Cu/*N*-hydroxy catalyzed annulation. After the reaction, the mixture was filtered and purified by column chromatography to give **3a** as the product.

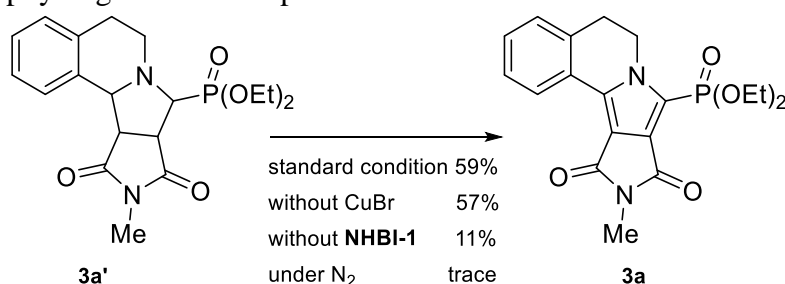



## 6 Gram-Scale Reaction

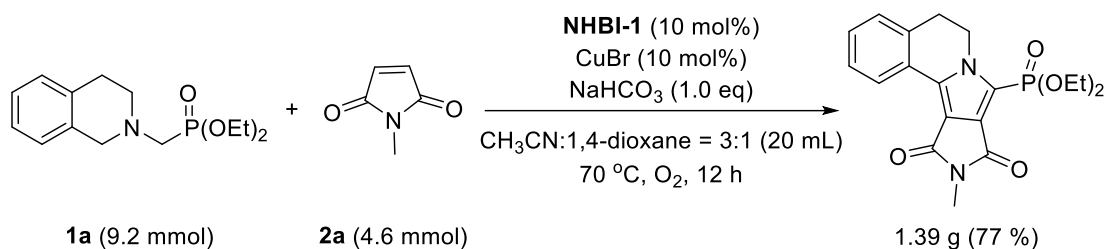

According to the general procedure, **1a** (2.61g, 9.2 mmol), **2a** (0.51g, 4.6 mmol), NaHCO<sub>3</sub> (4.6 mmol), CuBr (10 mol%), **NHBI-1** (10 mol%) and solvent (20 mL, CH<sub>3</sub>CN:1,4-dioxane = 3:1) were added into sealed tube under oxygen atmosphere, and the mixture was stirred at 70 °C for 12 h. After the reaction, the mixture was filtered and purified by column chromatography (eluting with Hexane/EtOAc) to give **3a** (1.39g, 77%) as the product.

## 7 NHBI Catalyzed Other C–H Functionalization Reaction

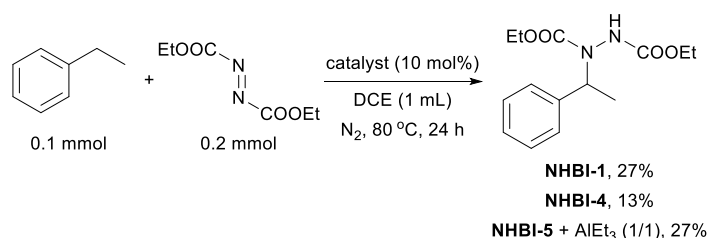

The premixed **NHBI-5** and AlEt<sub>3</sub> provided a comparable yield with **NHBI-1** in the reaction of benzylic C–H amination with diethyl azodicarboxylate under otherwise identical conditions. This result suggests the potential cooperative catalysis in this system. Obviously, further reaction condition optimization, modification of NHBI catalyst, mechanistic studies, etc., was required before practical application.

# 8 NMR Spectra

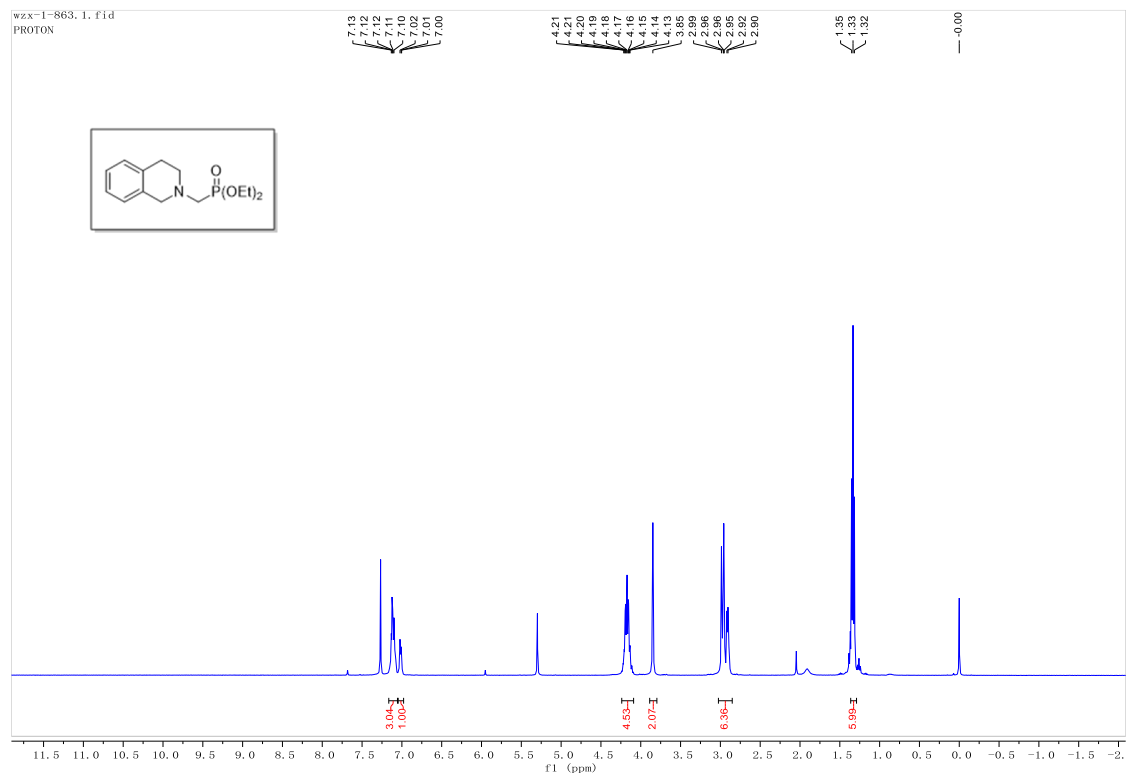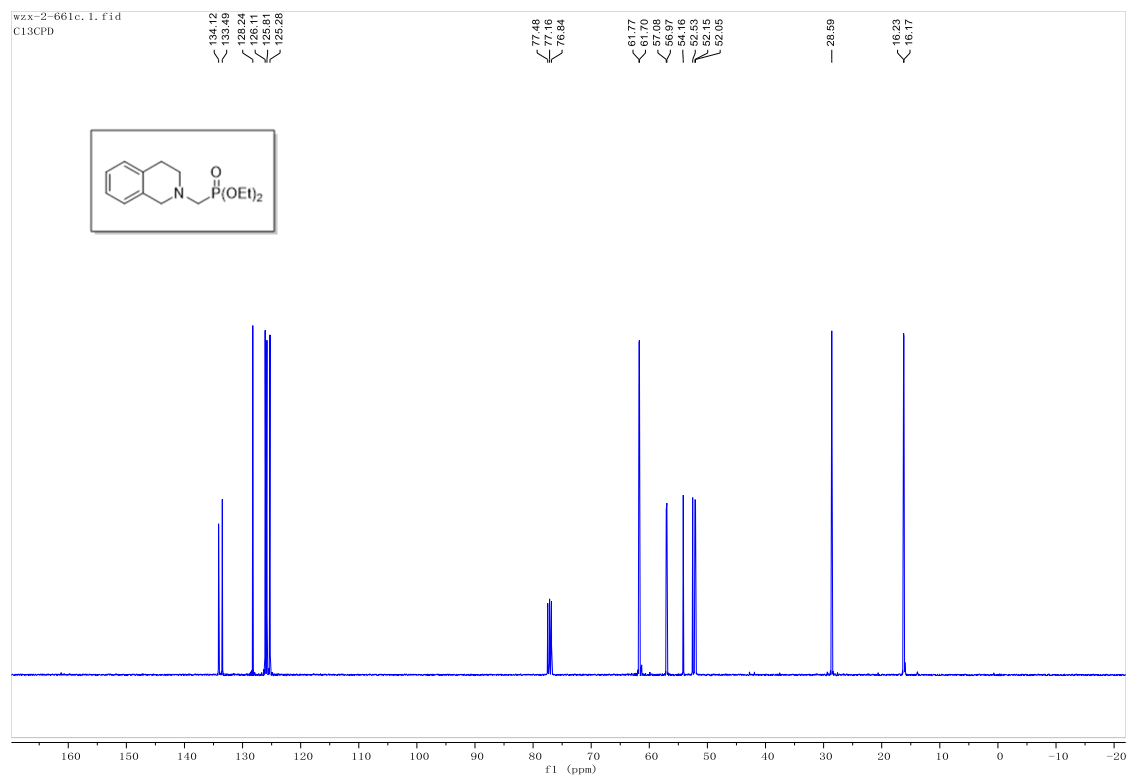

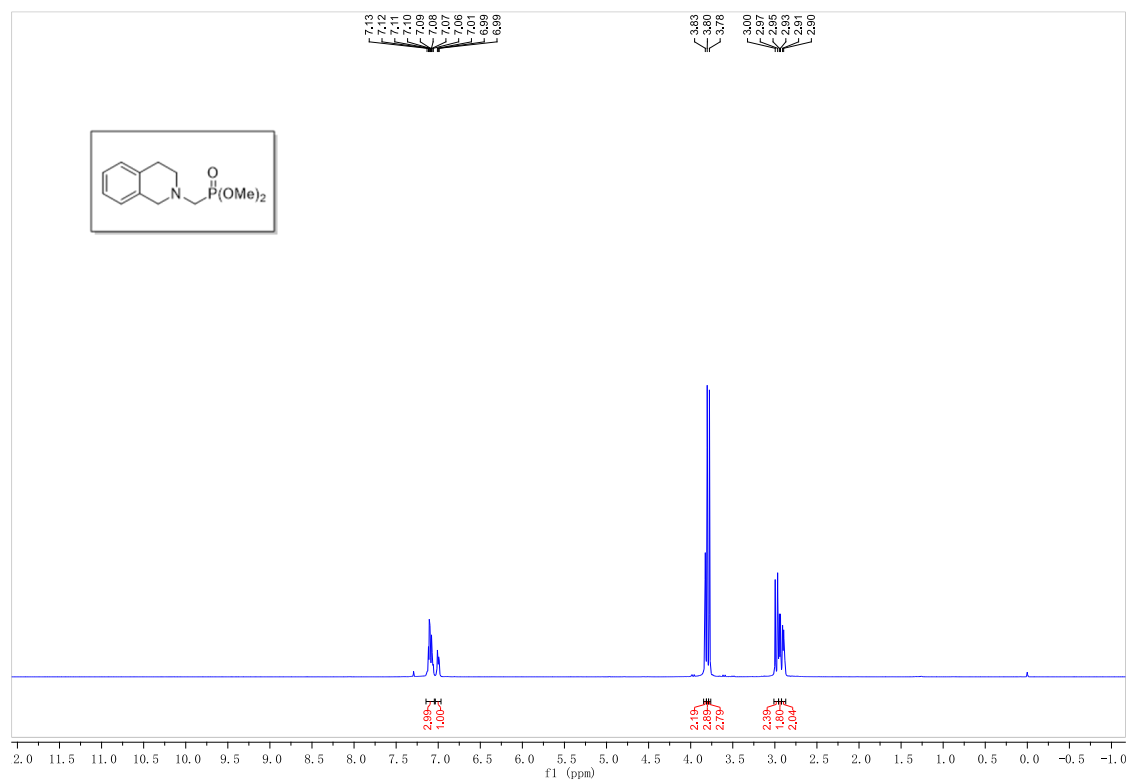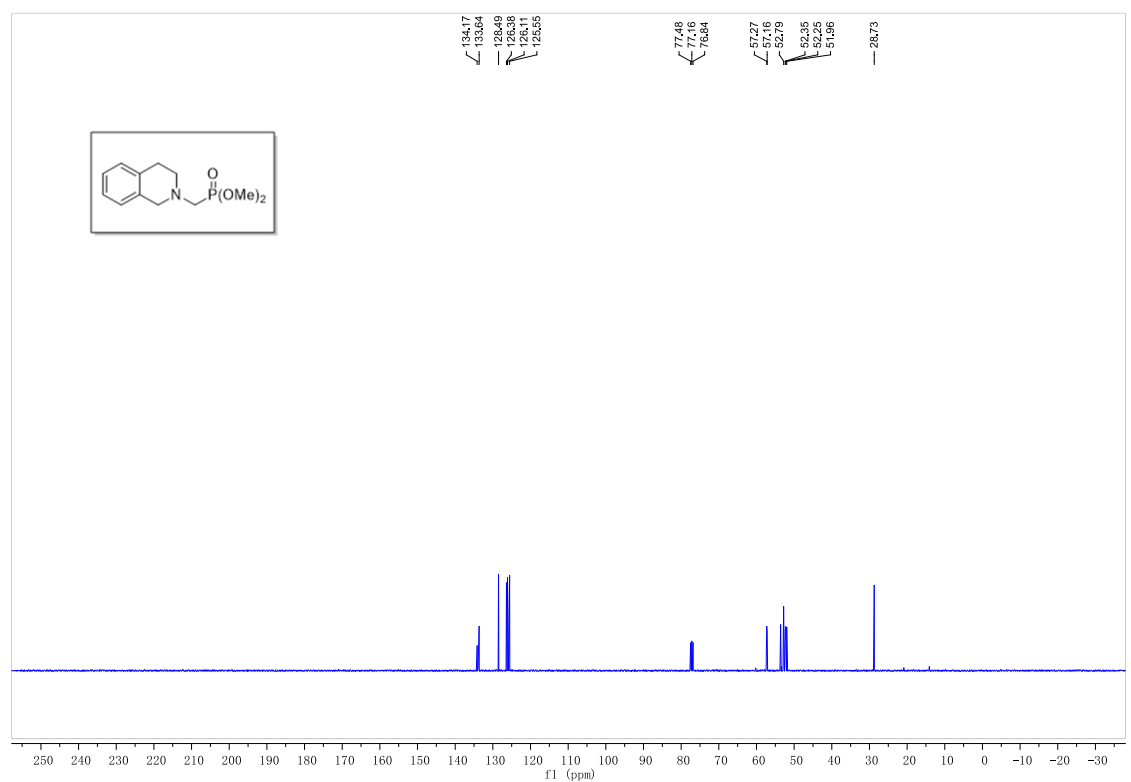

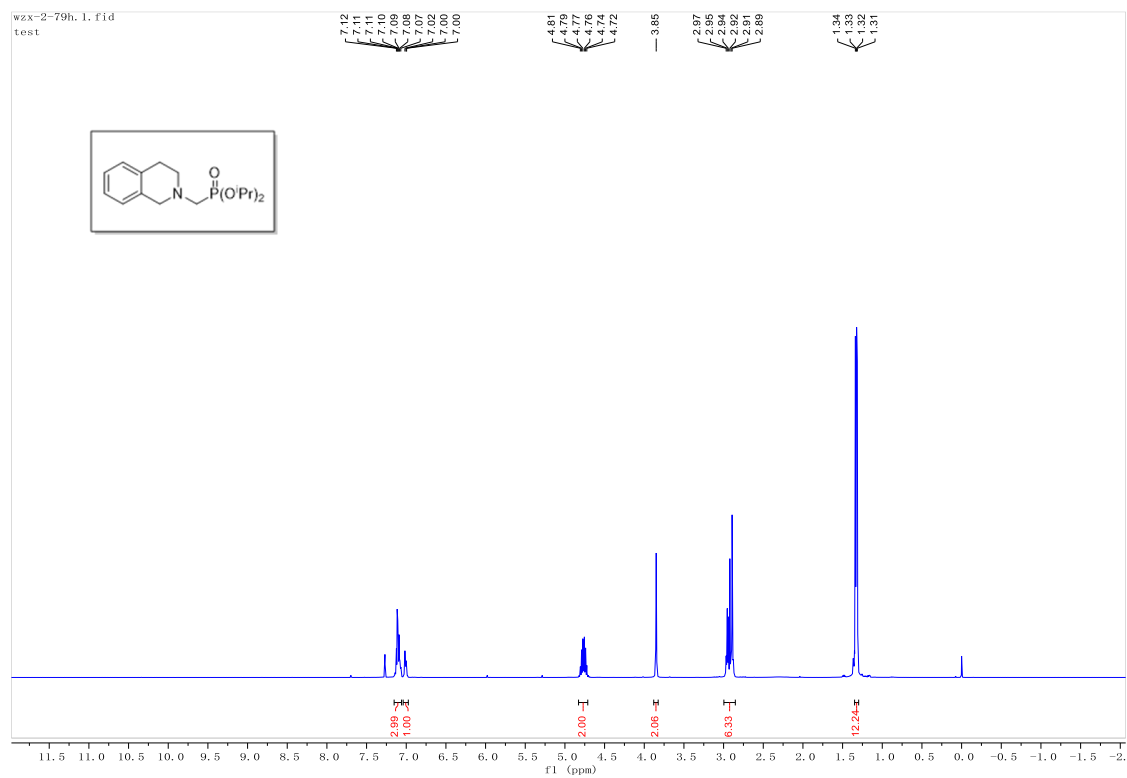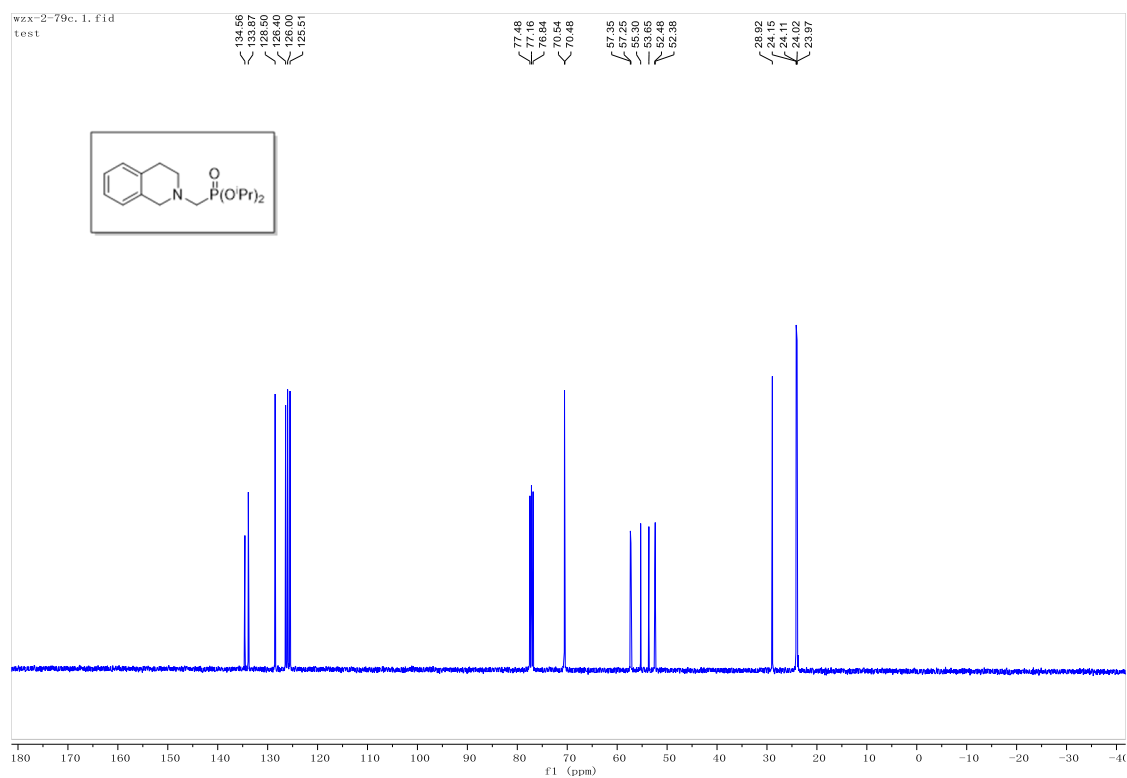

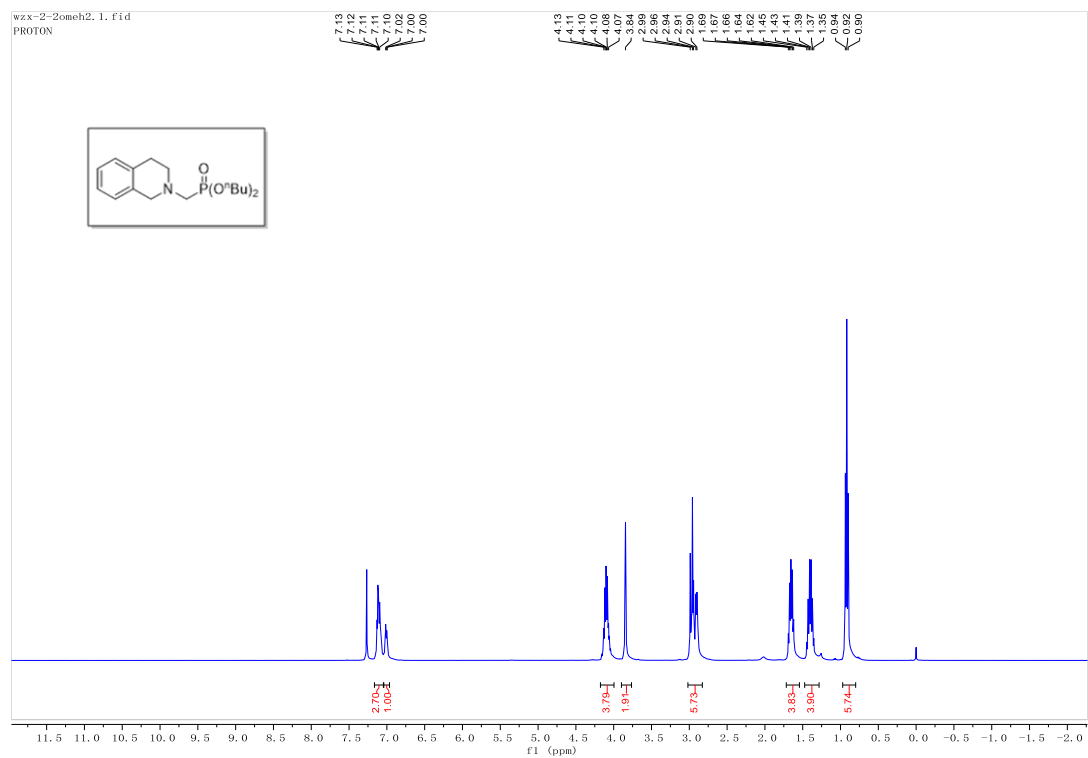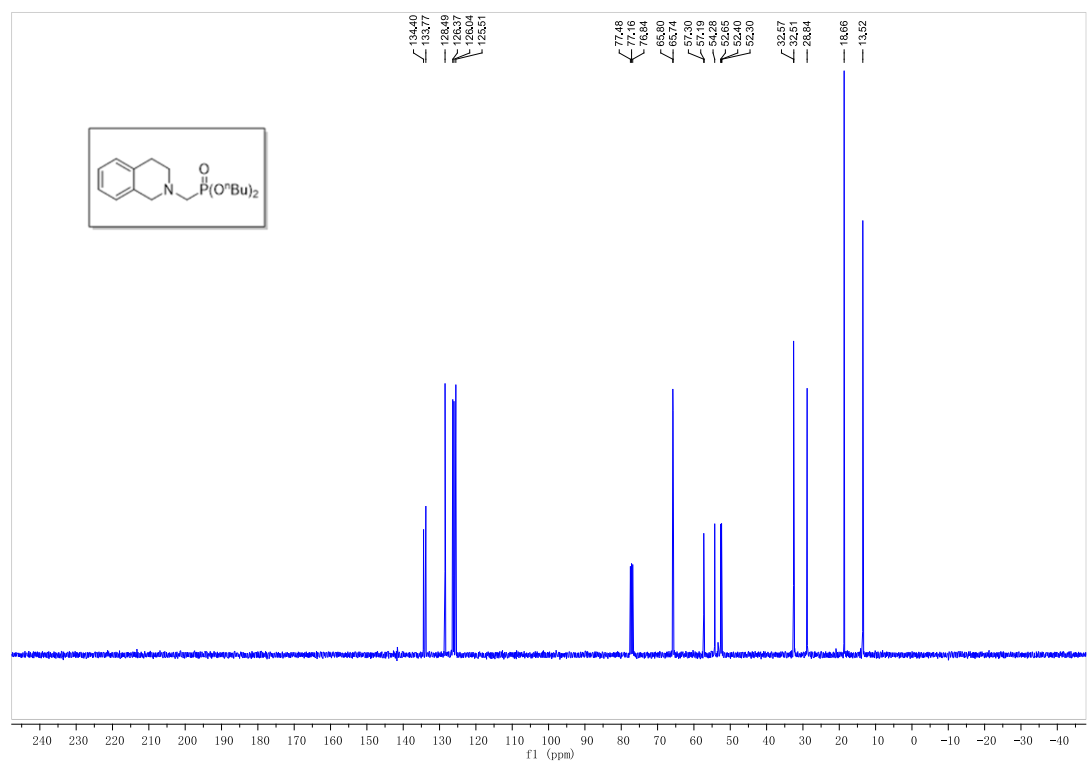

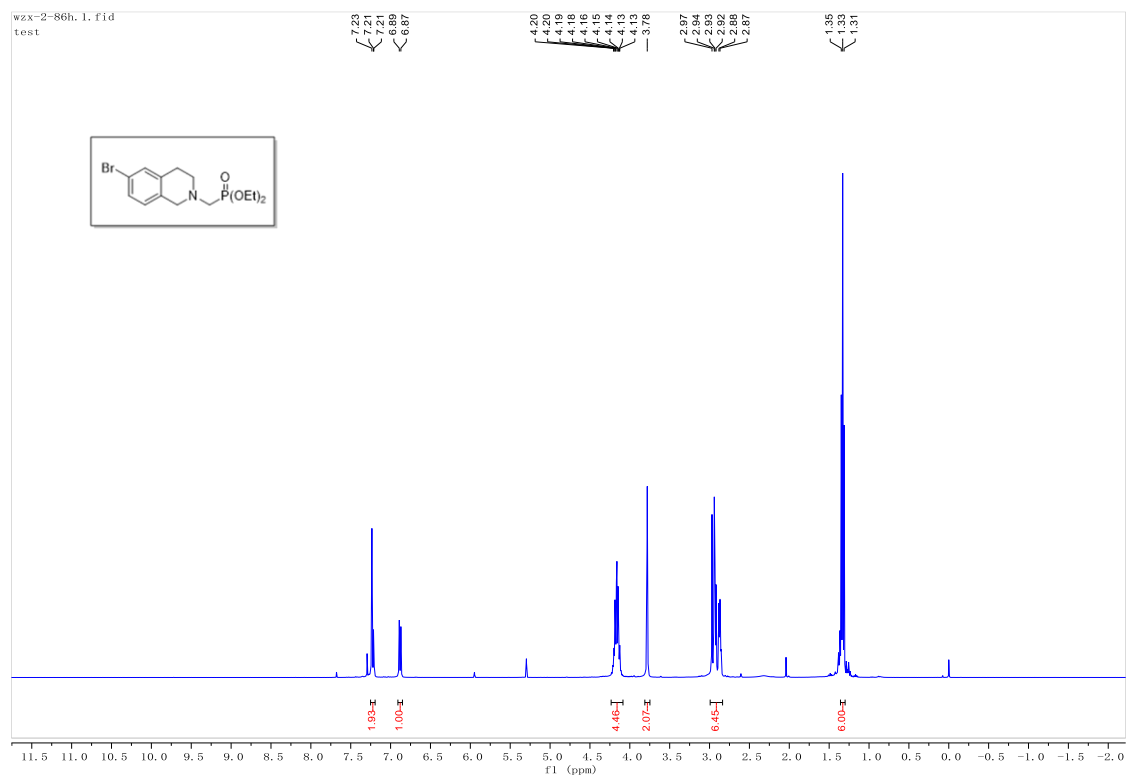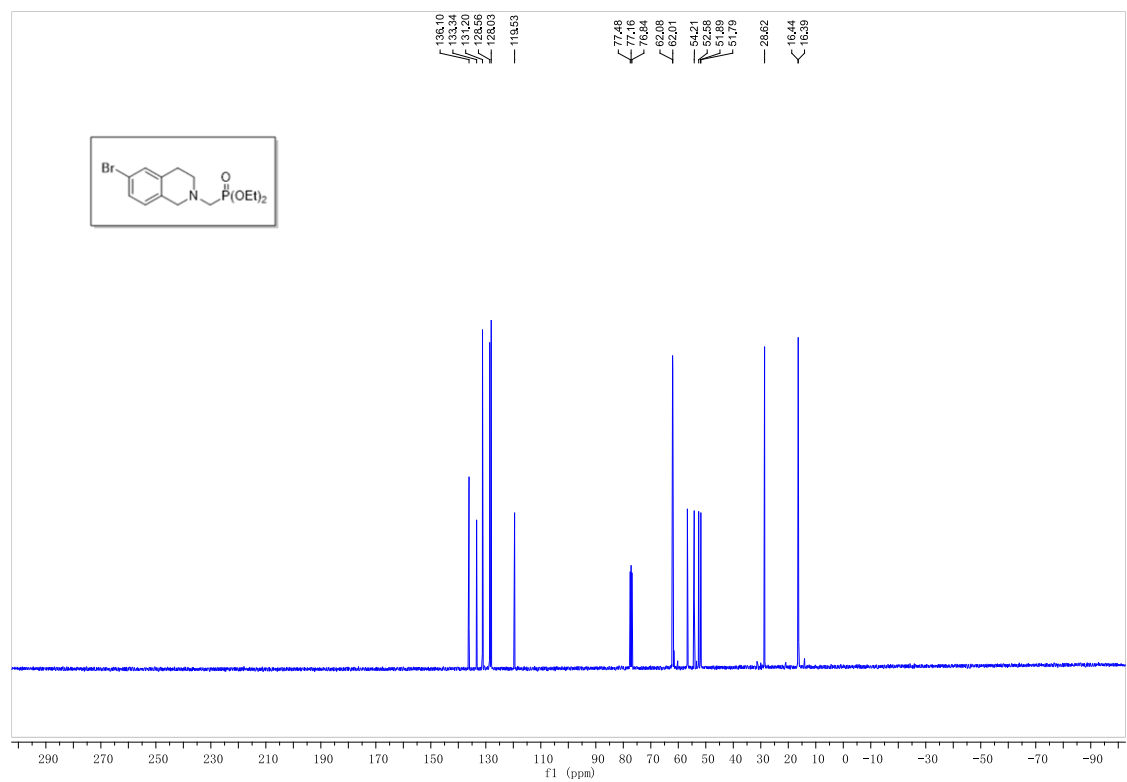

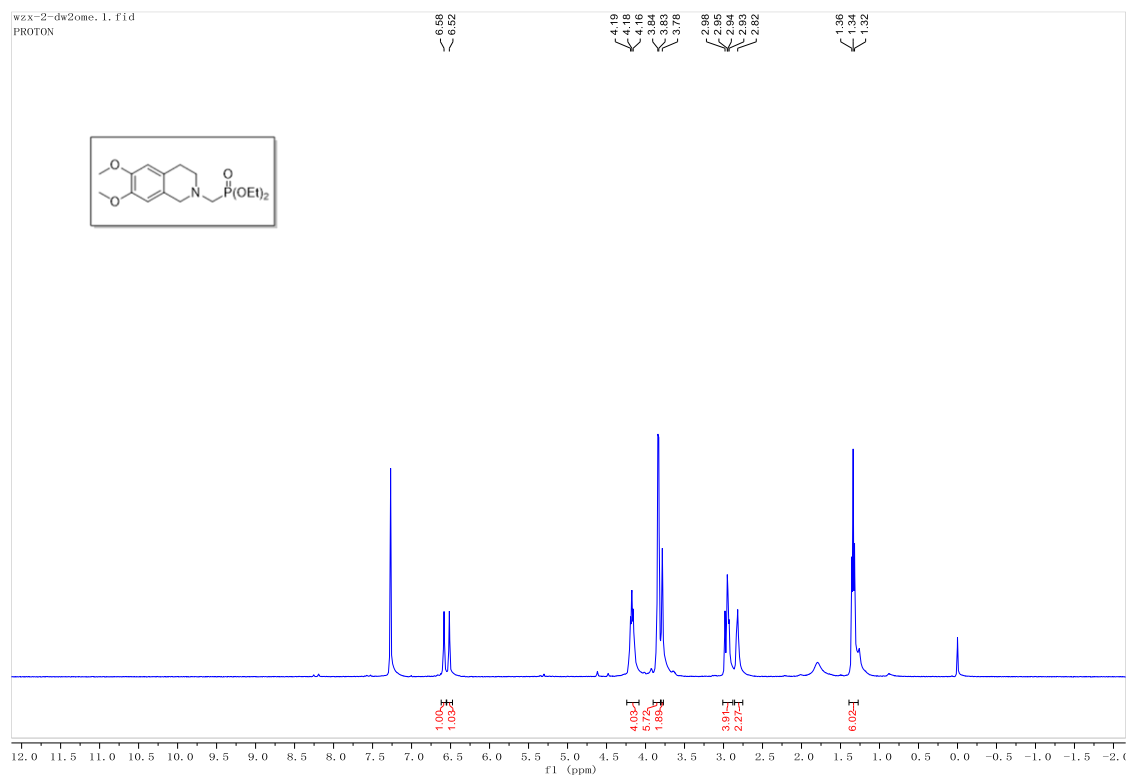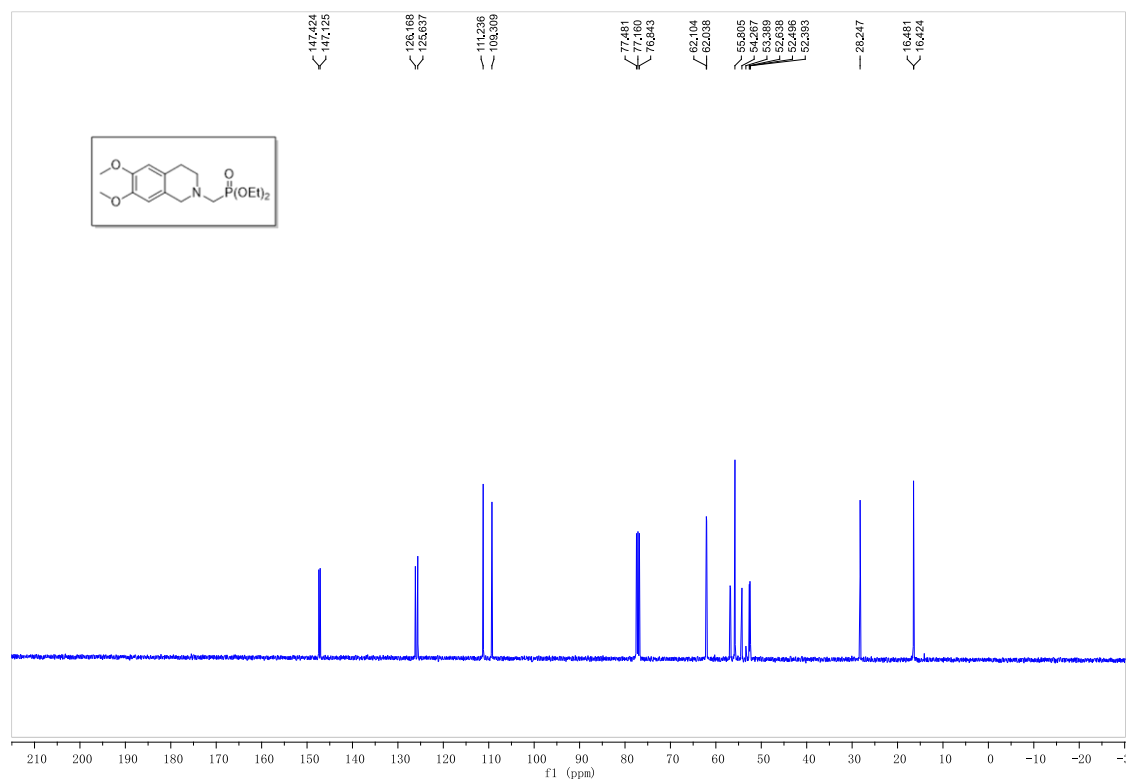

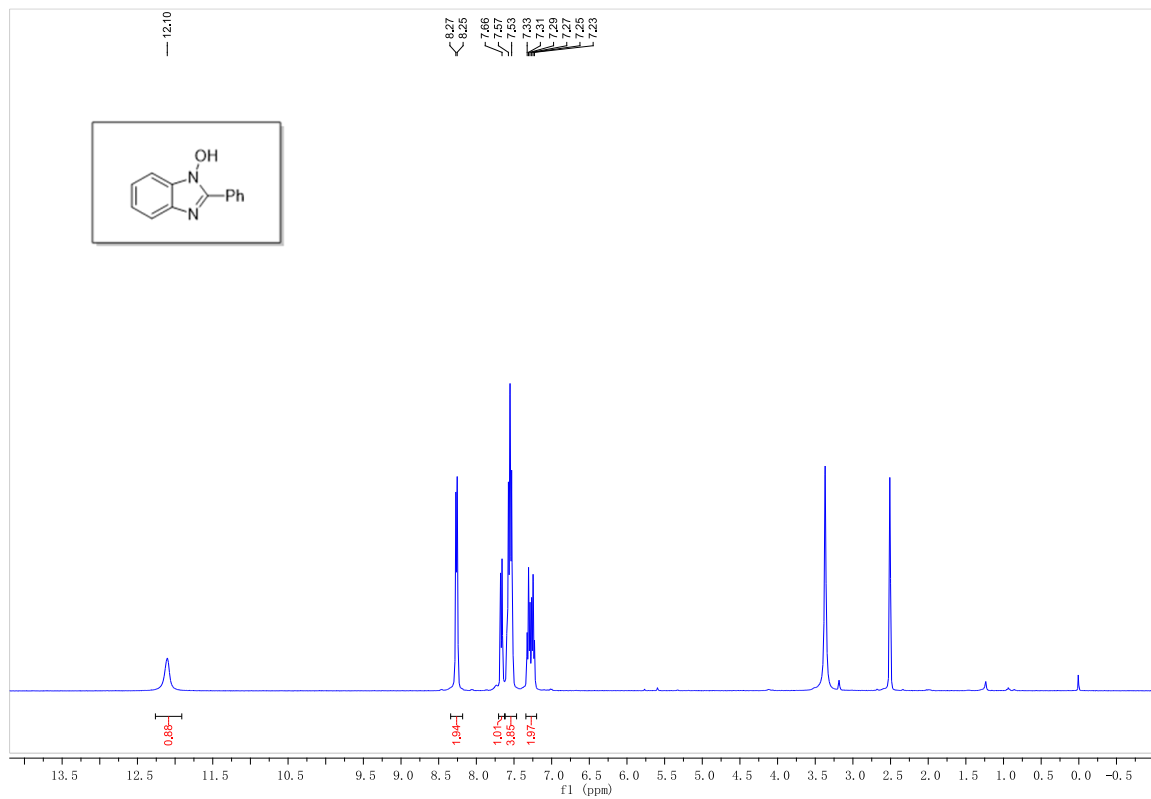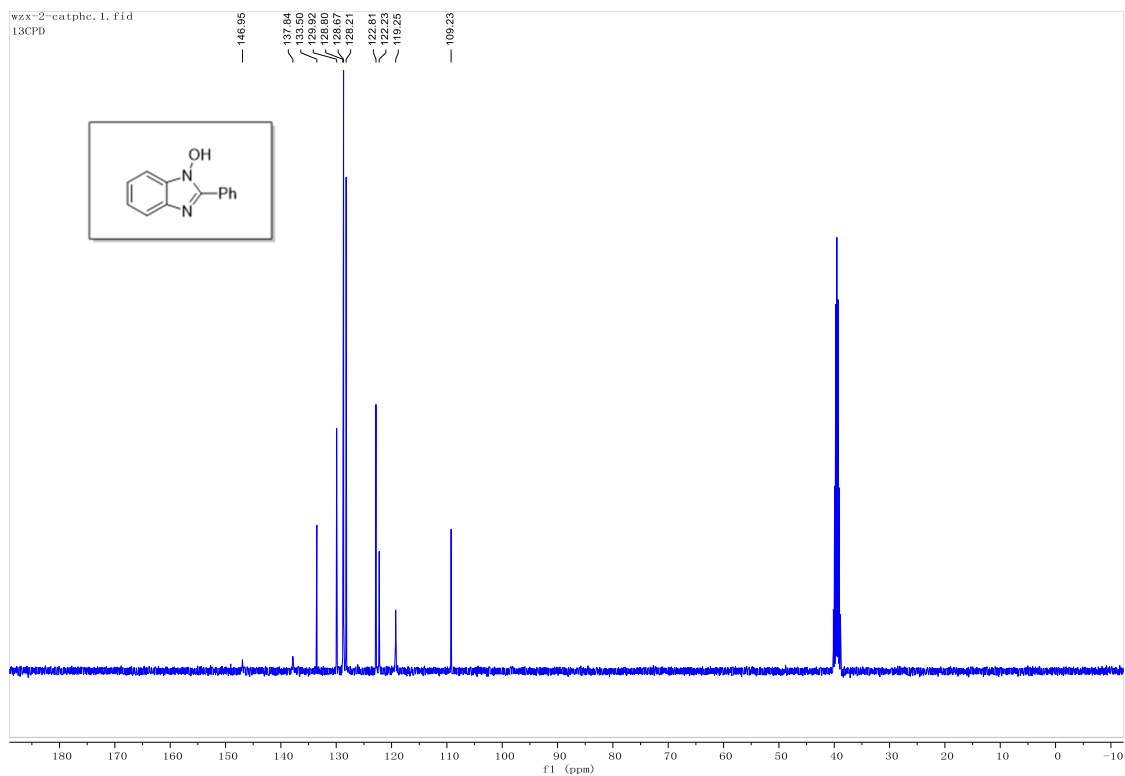



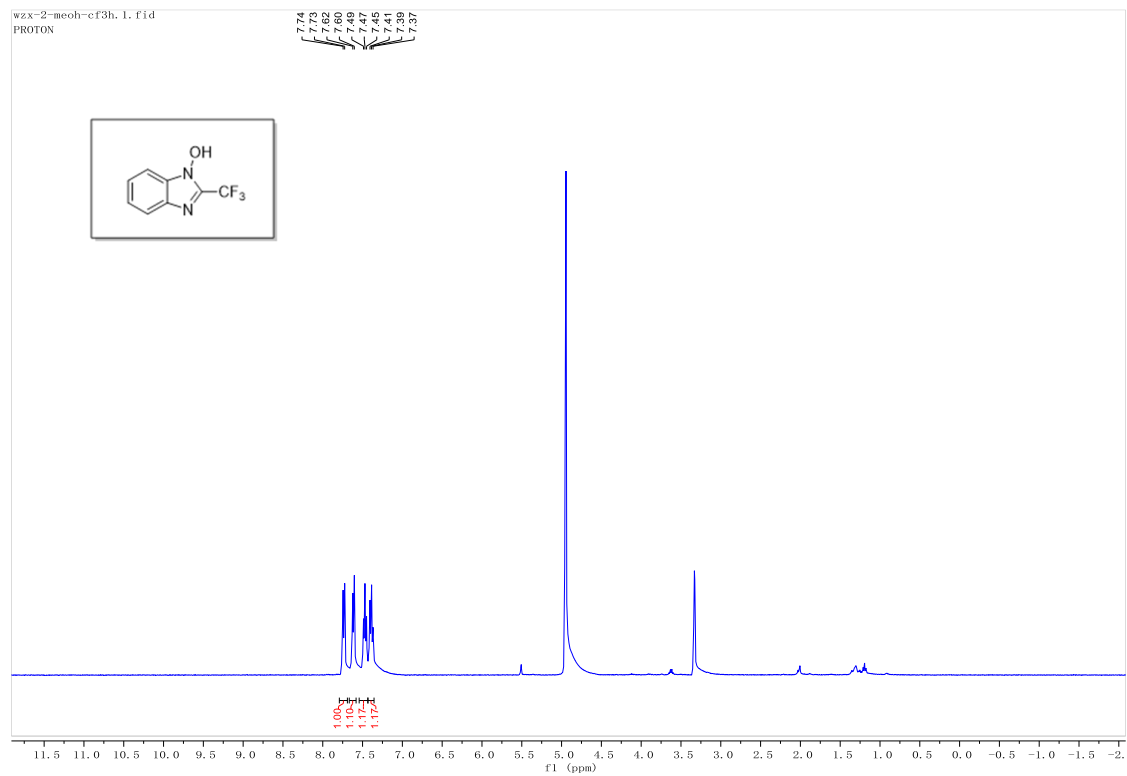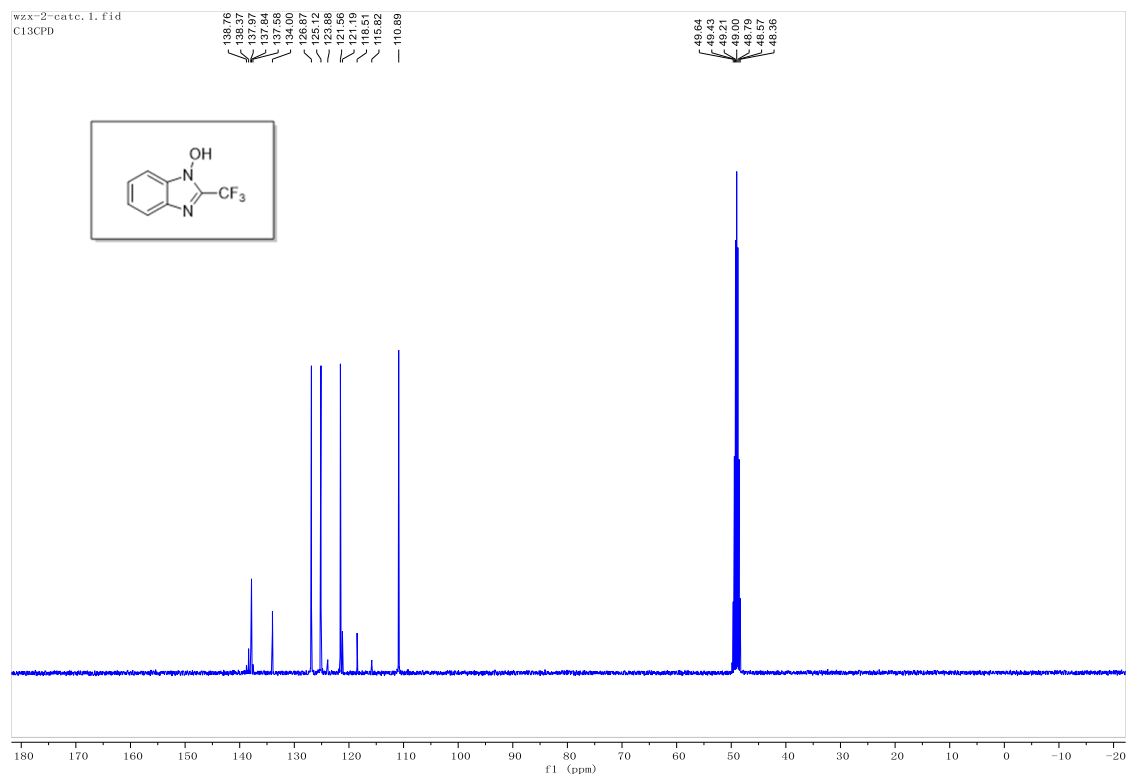

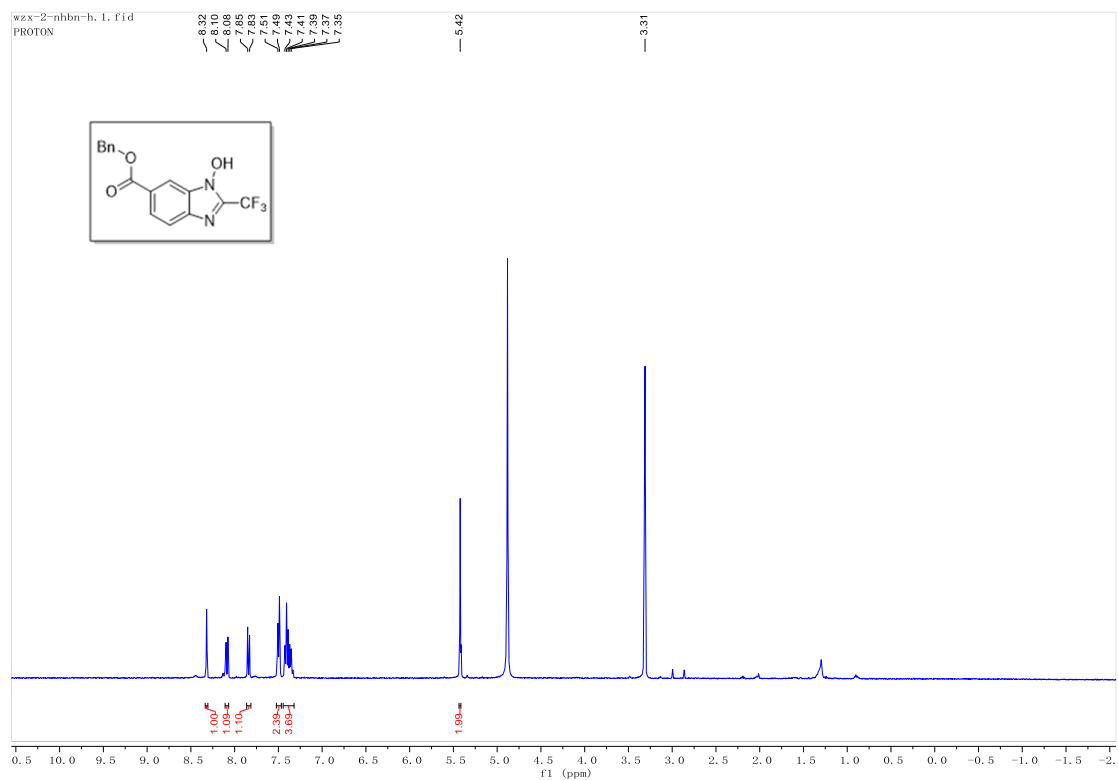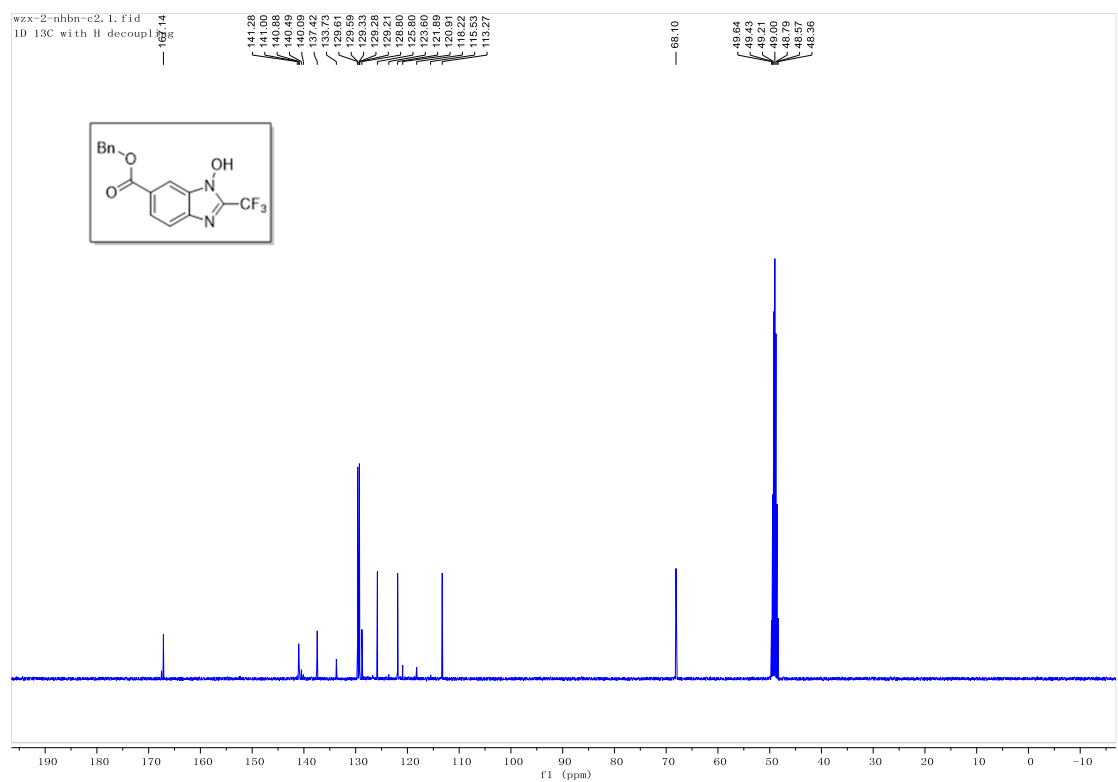

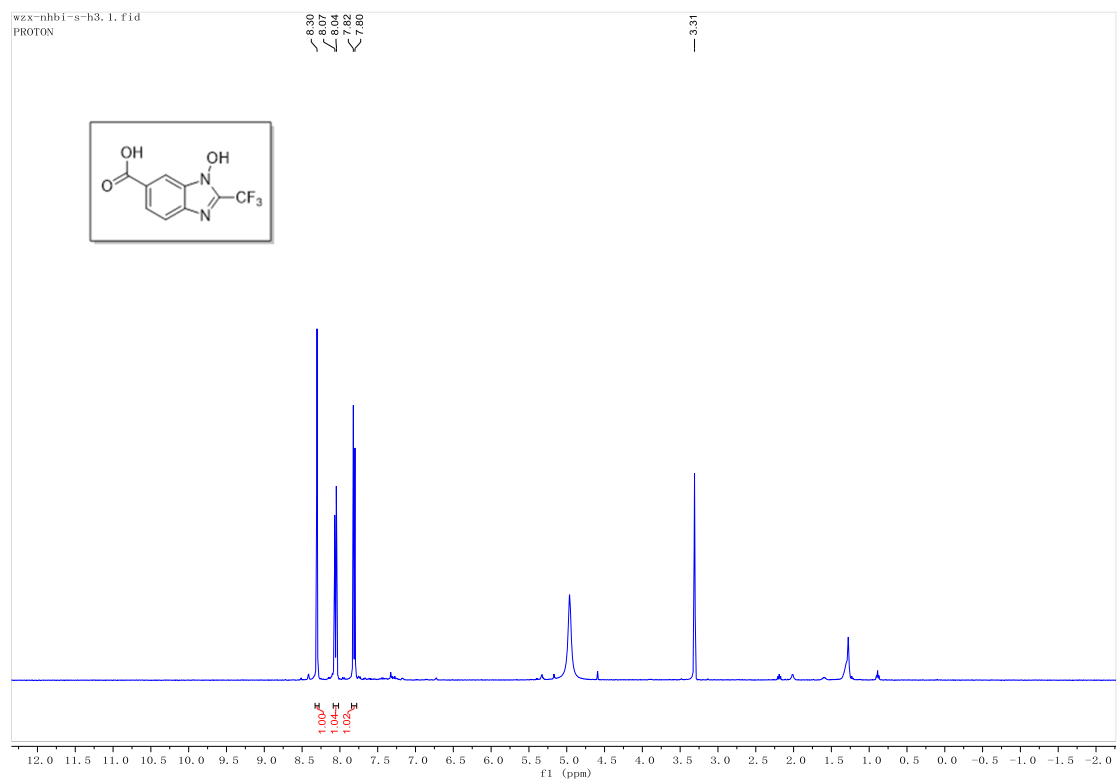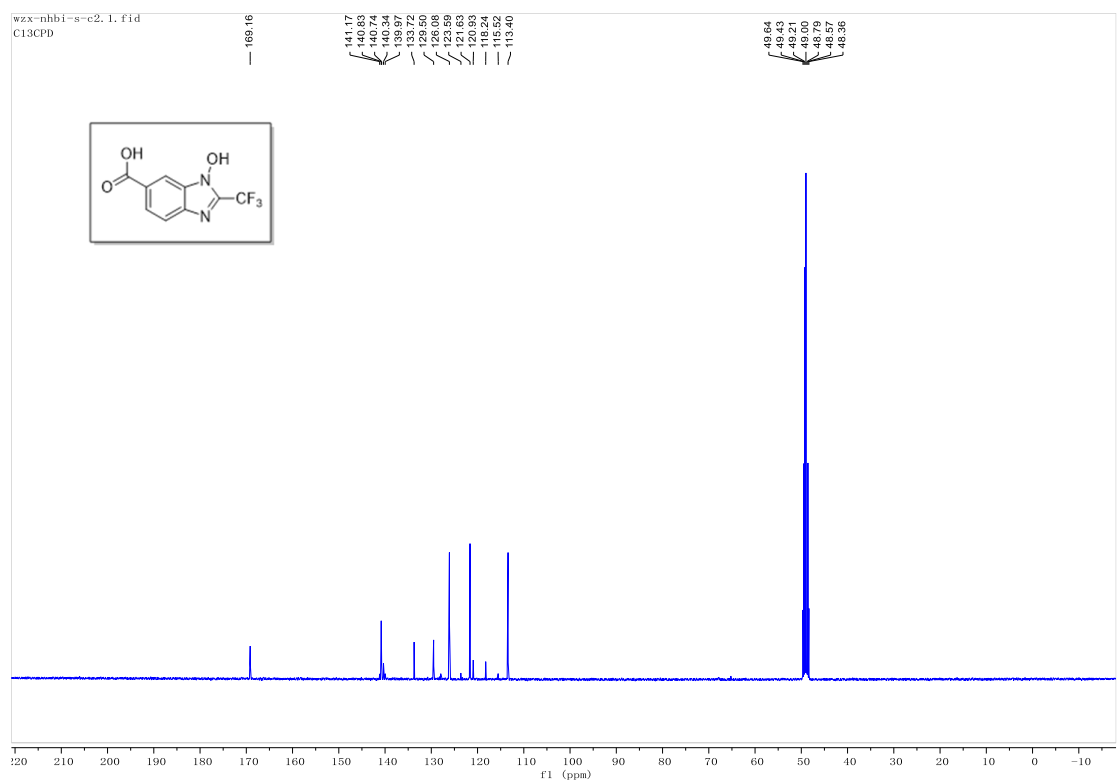

wzx-nhbi-h-h3.1.fid  
PROTON

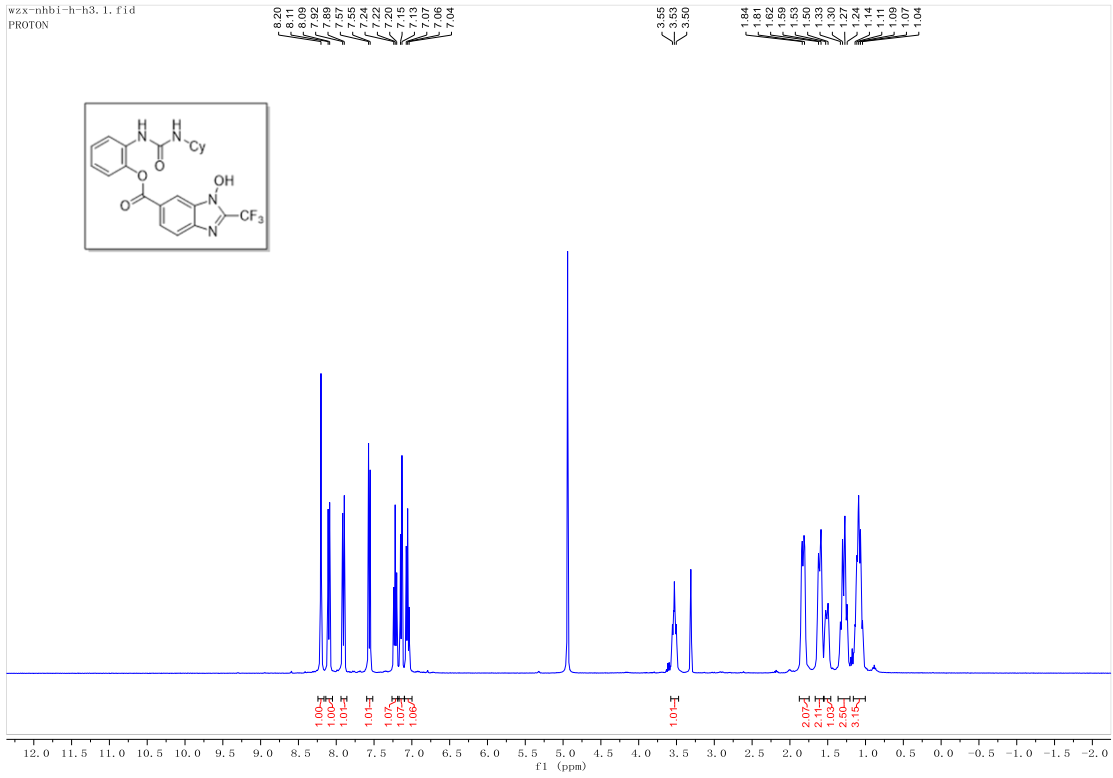

wzx-nhbi-h-c.1.fid  
ID 13C with H decoupling

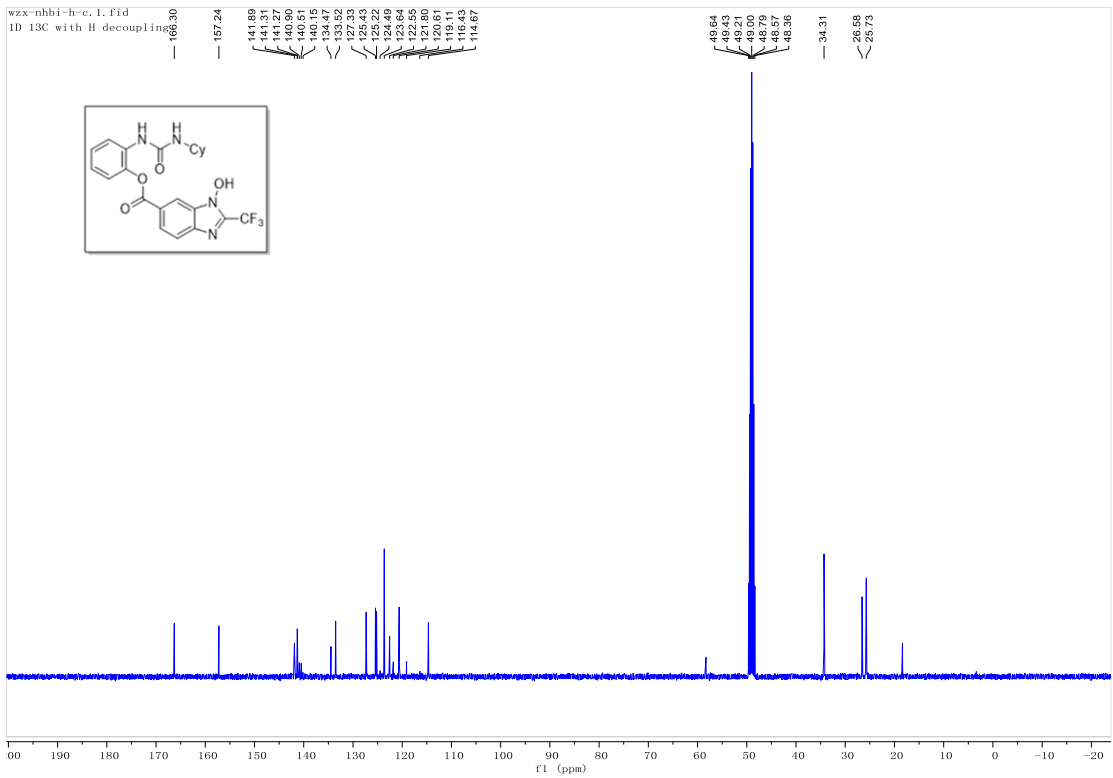

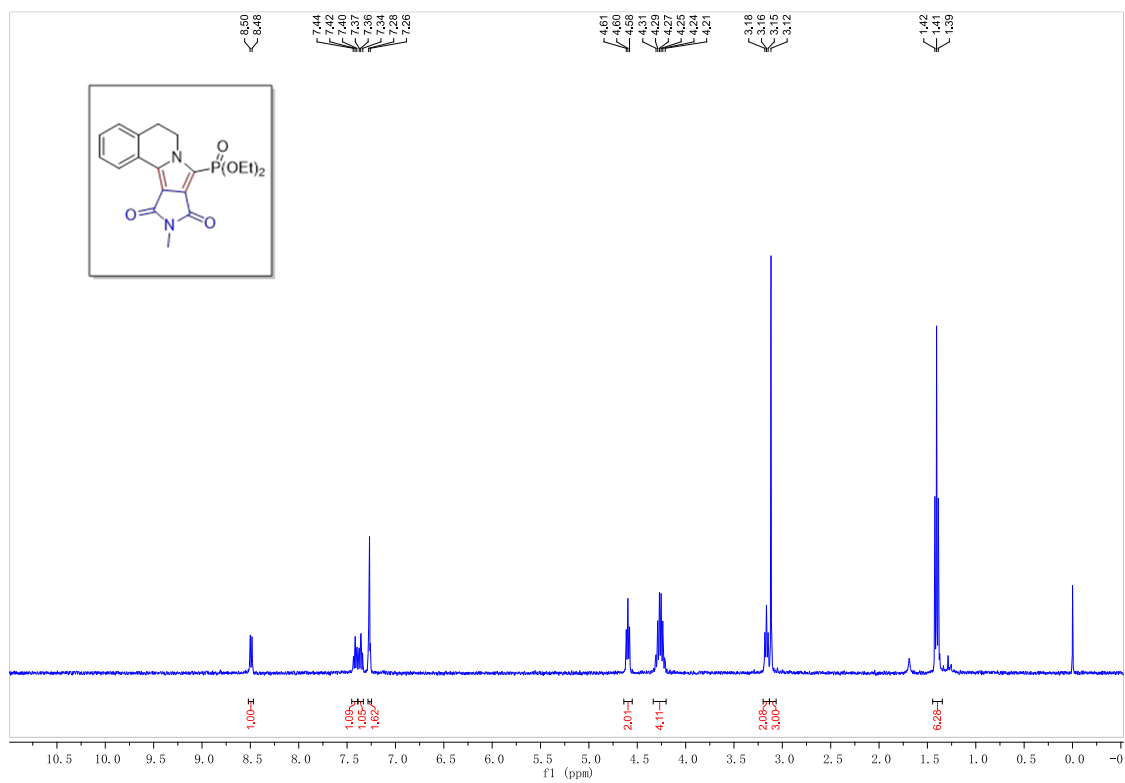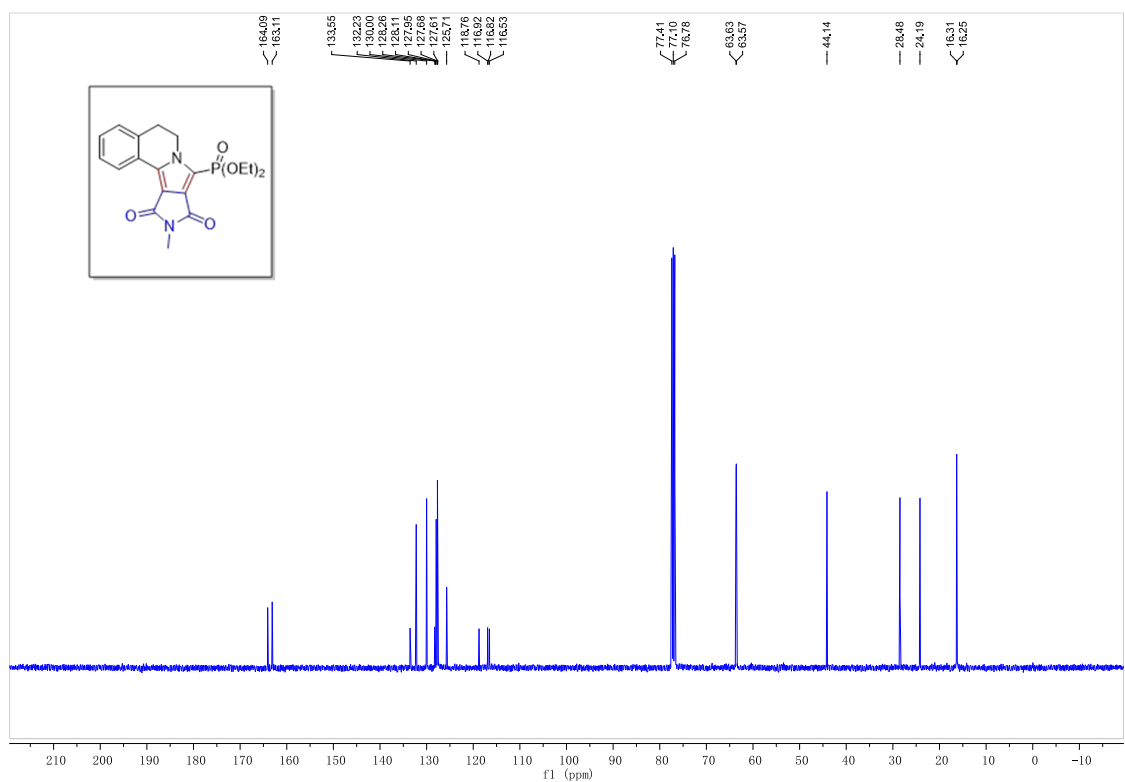

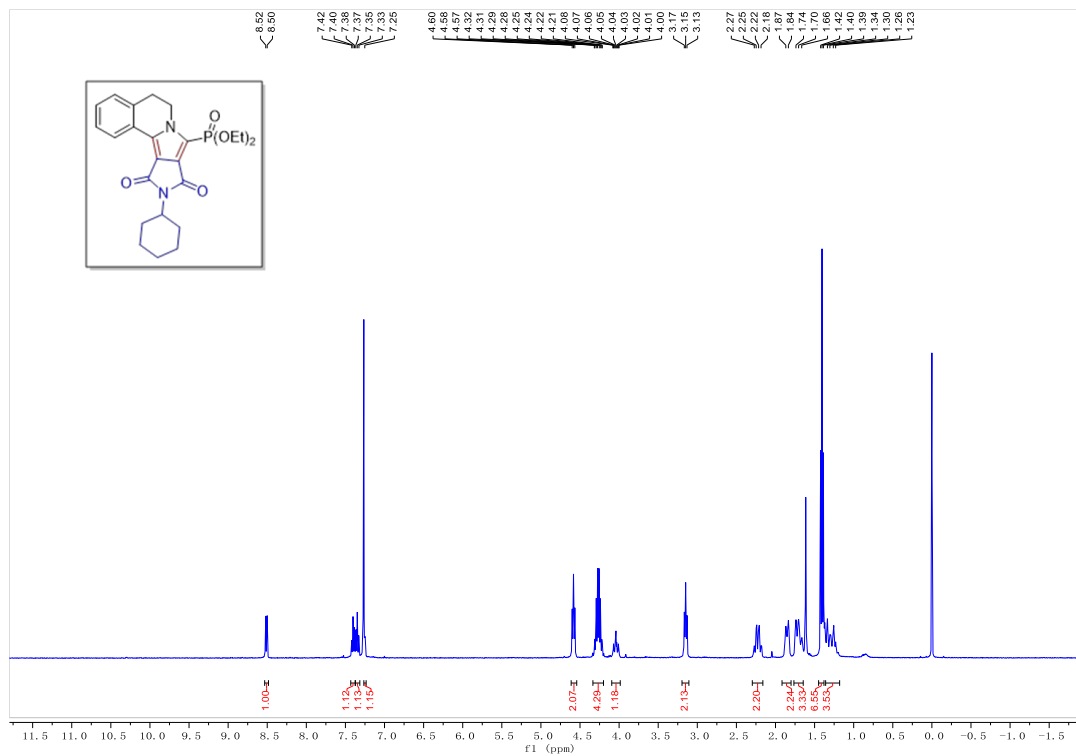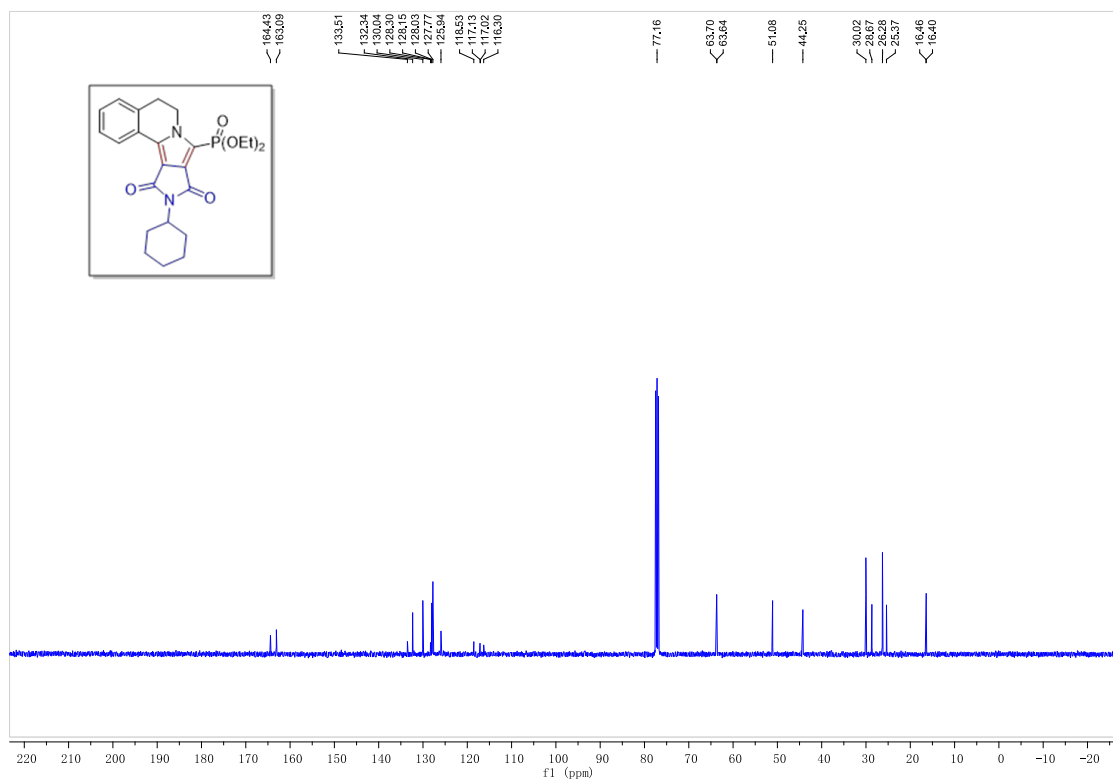

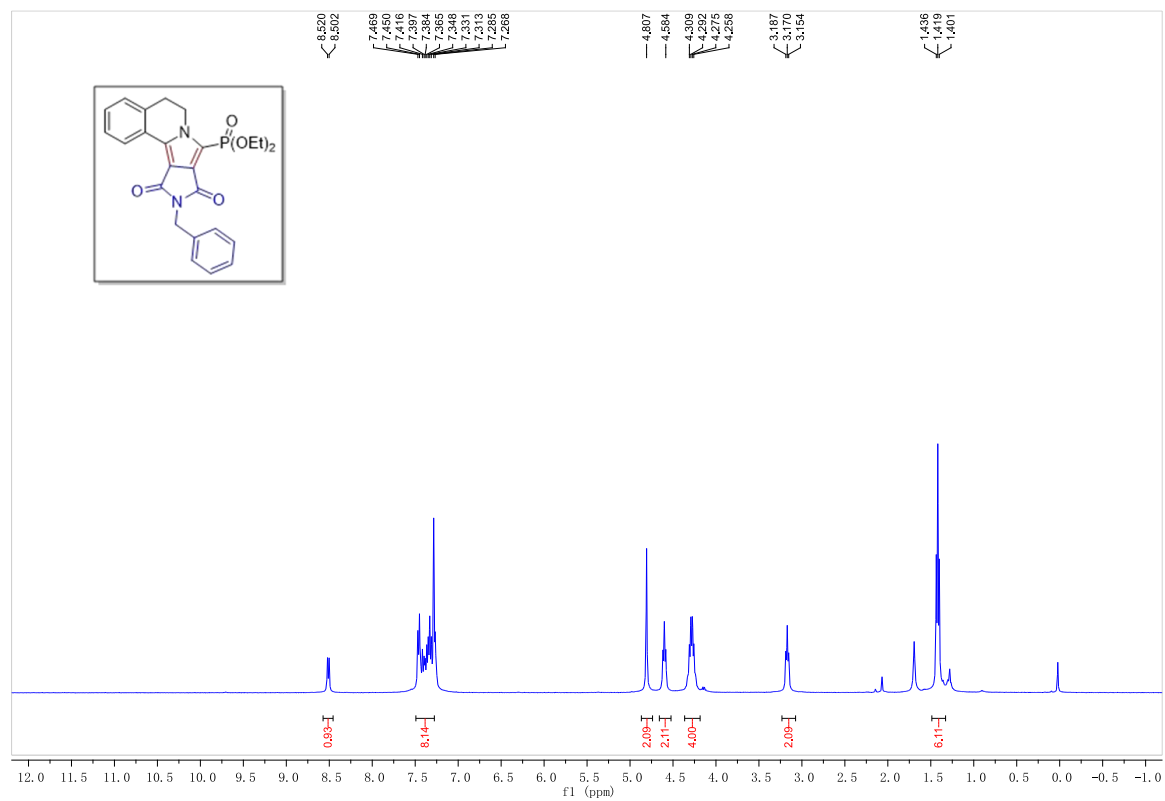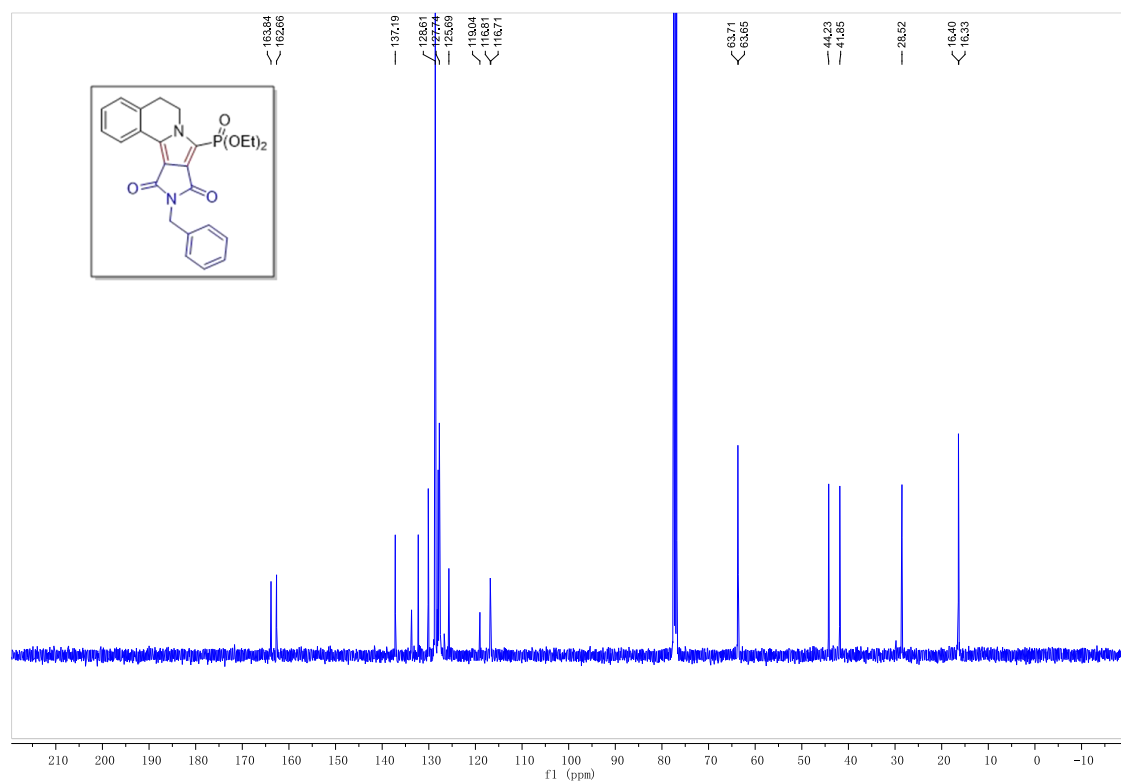

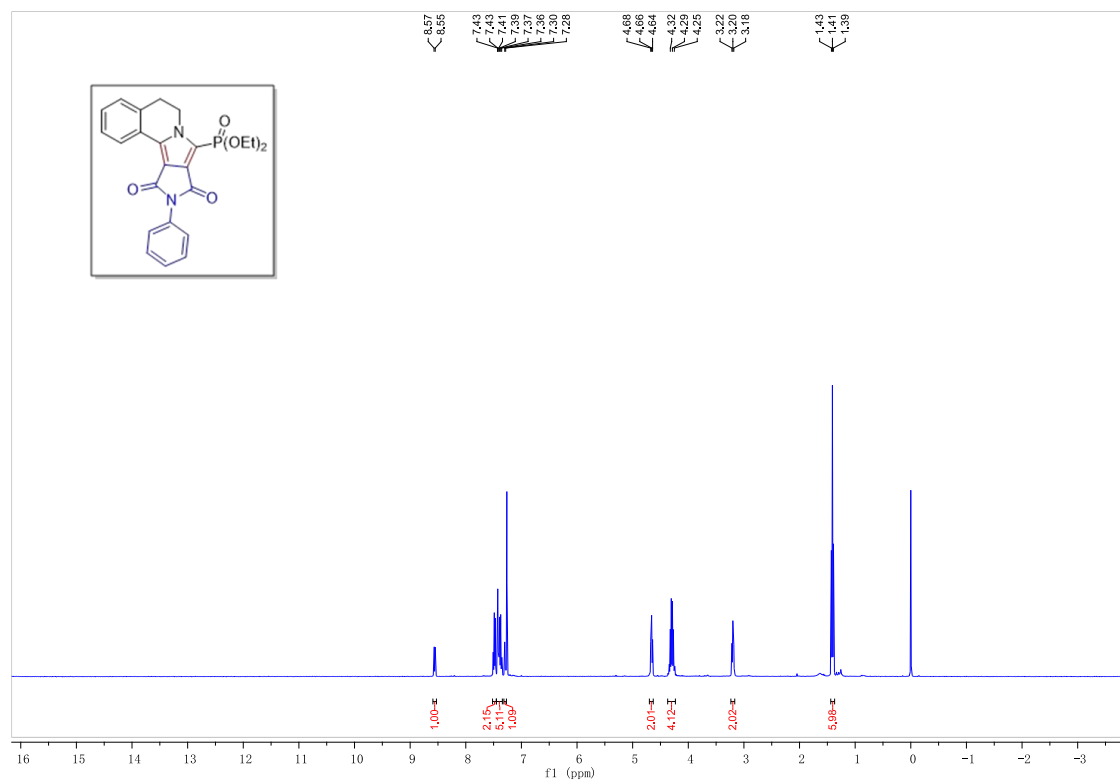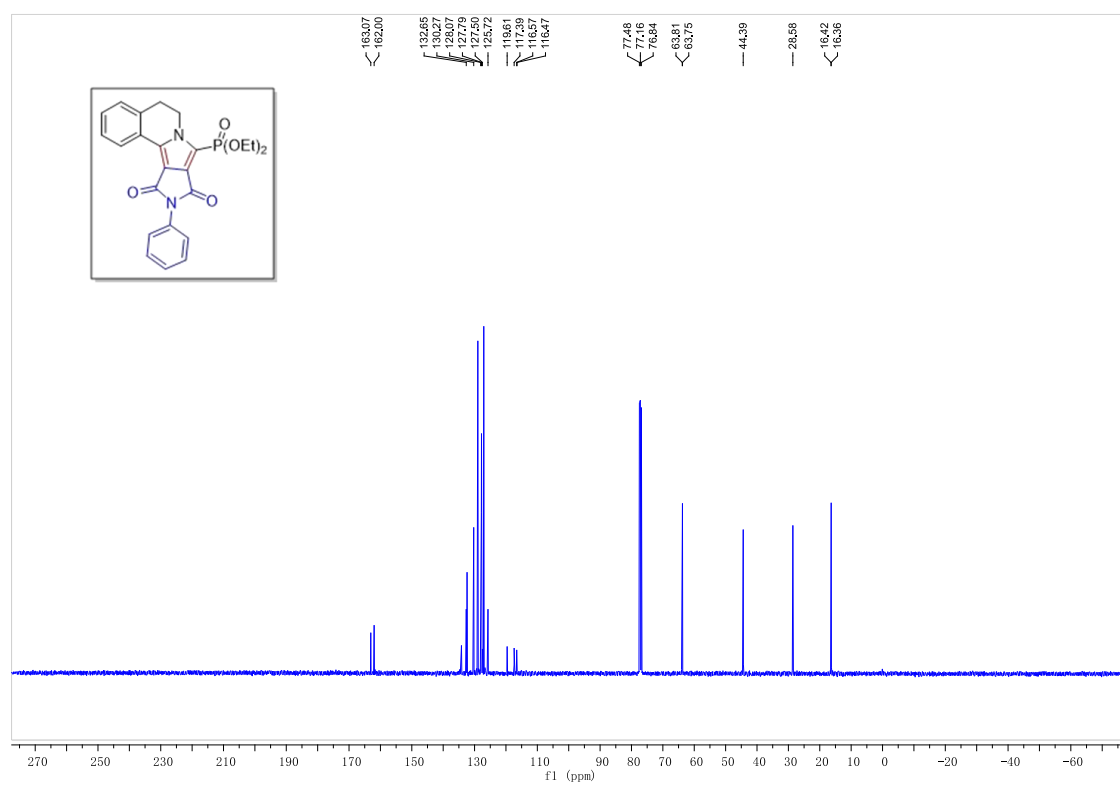



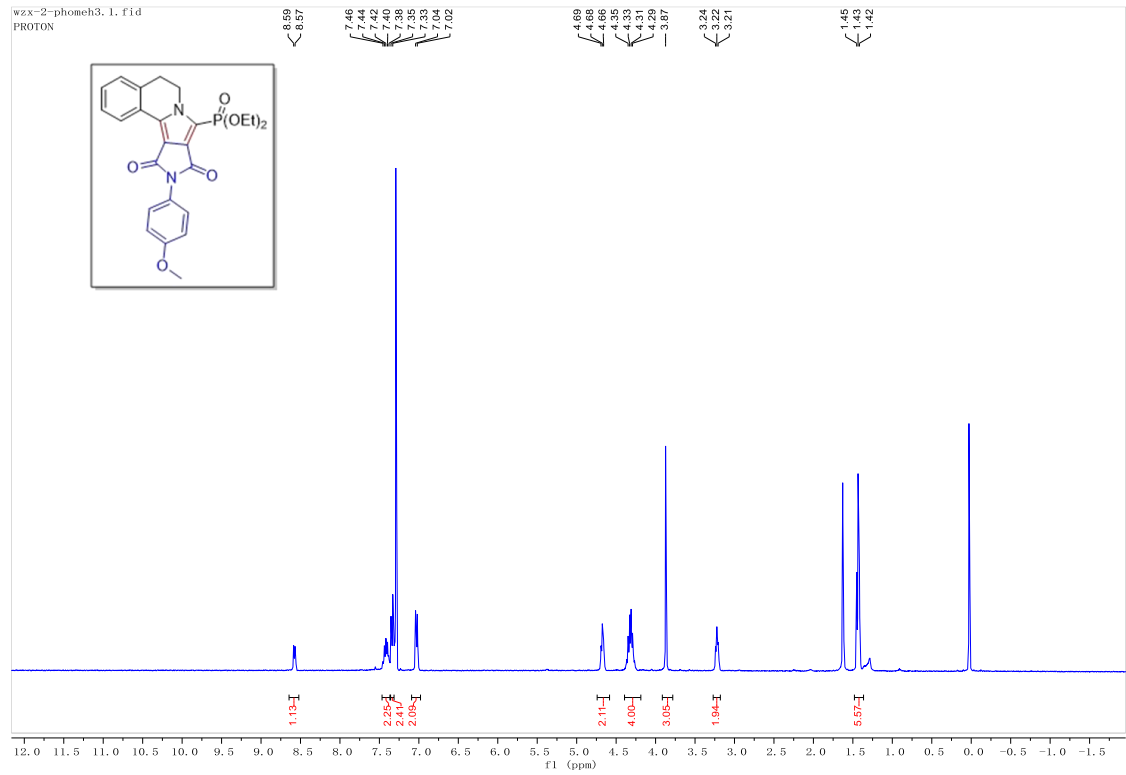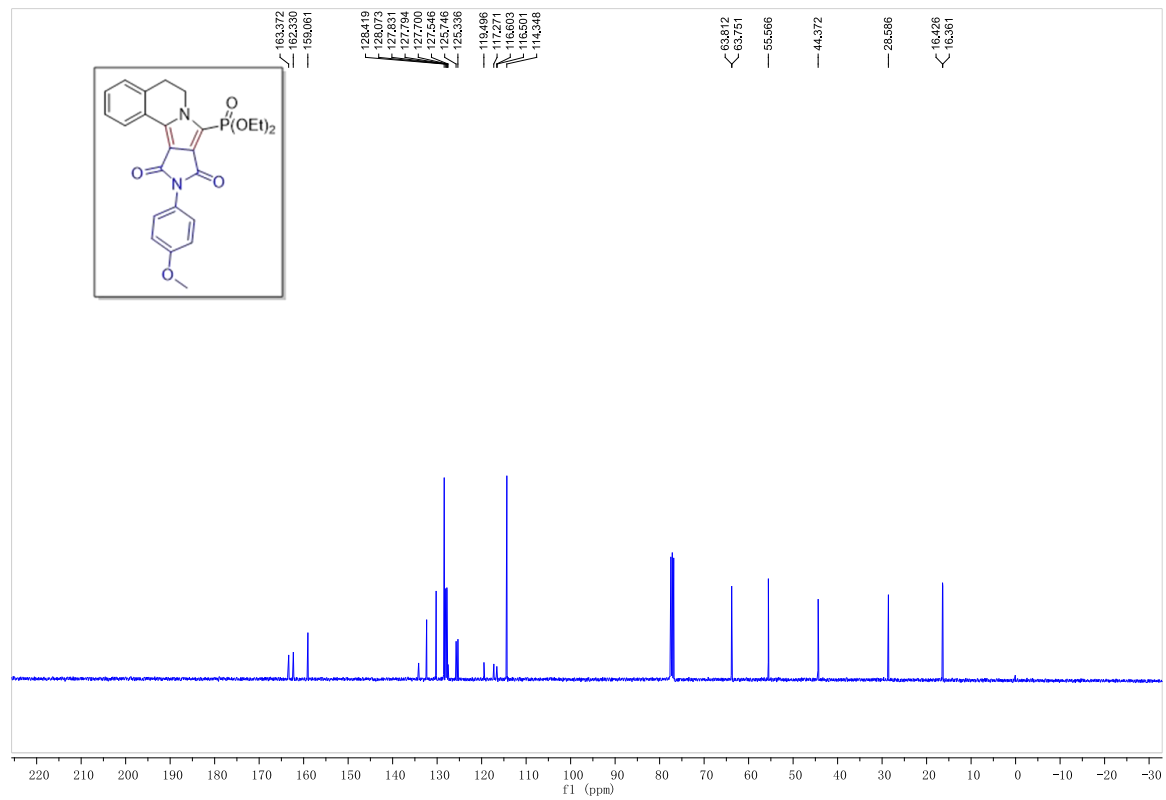

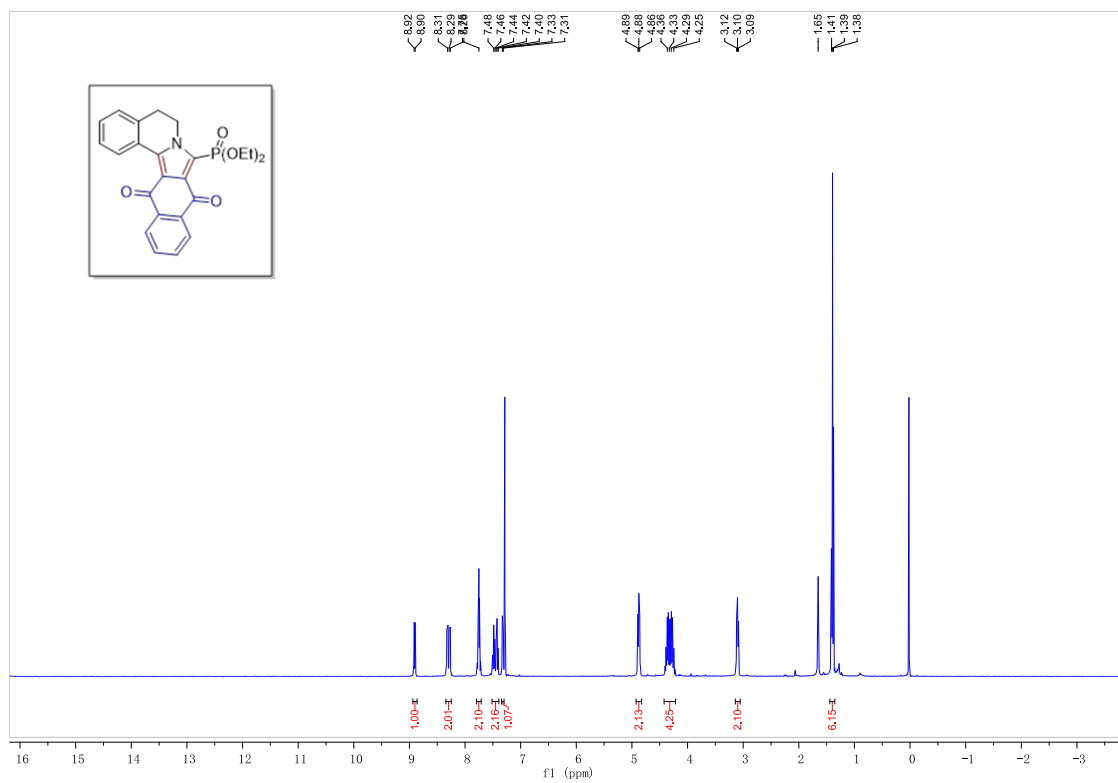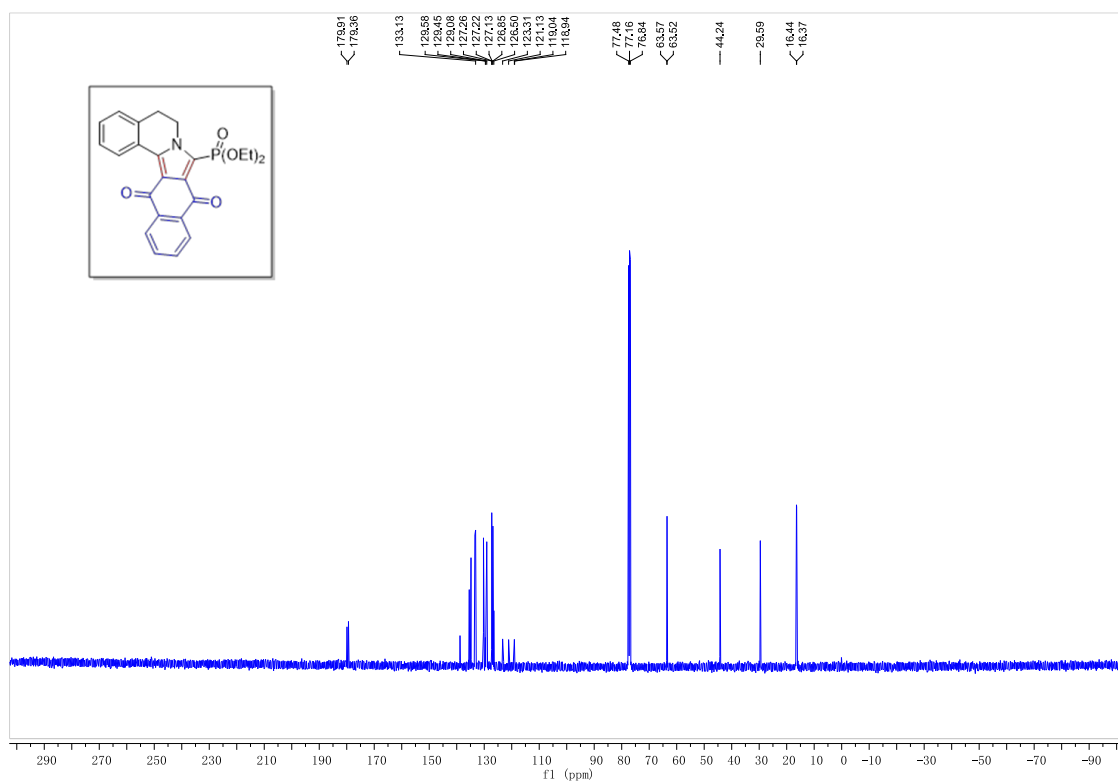

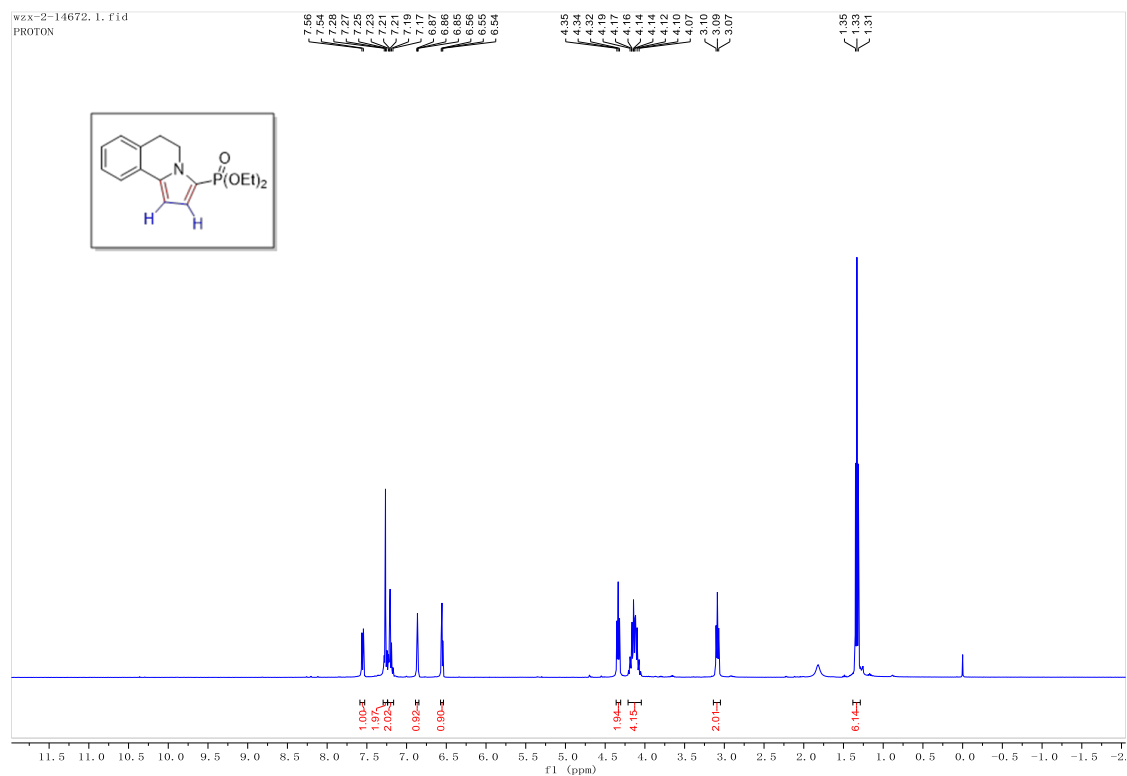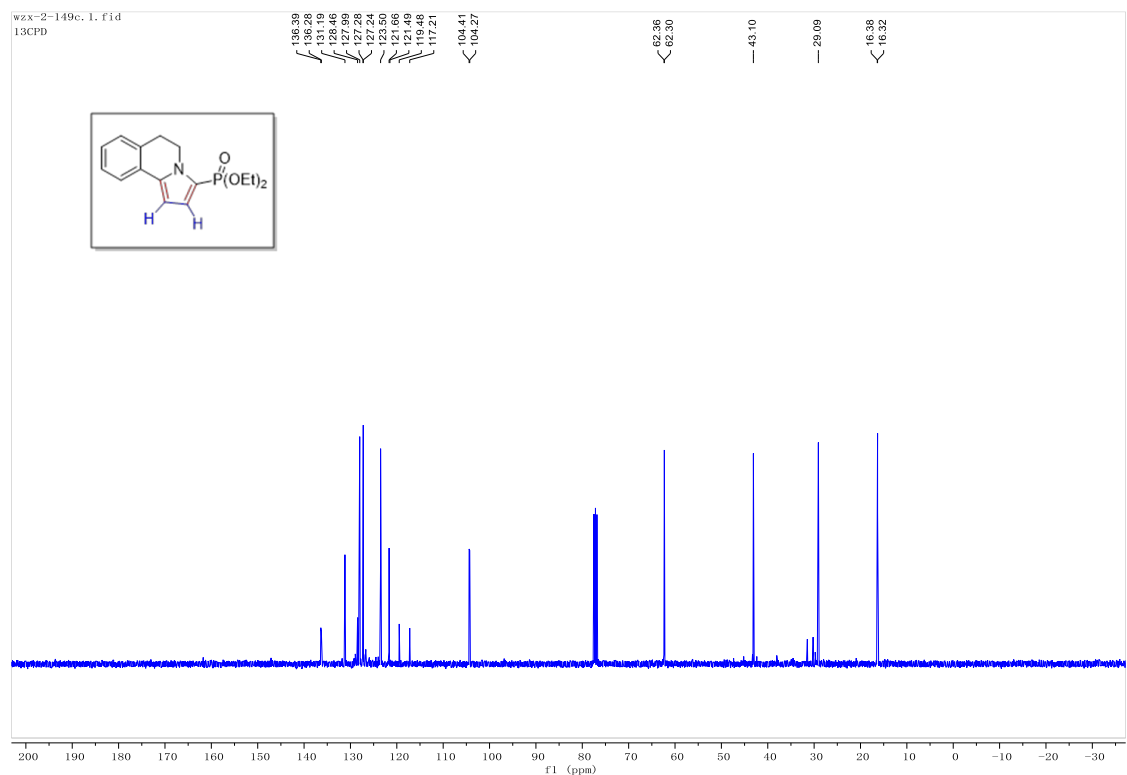

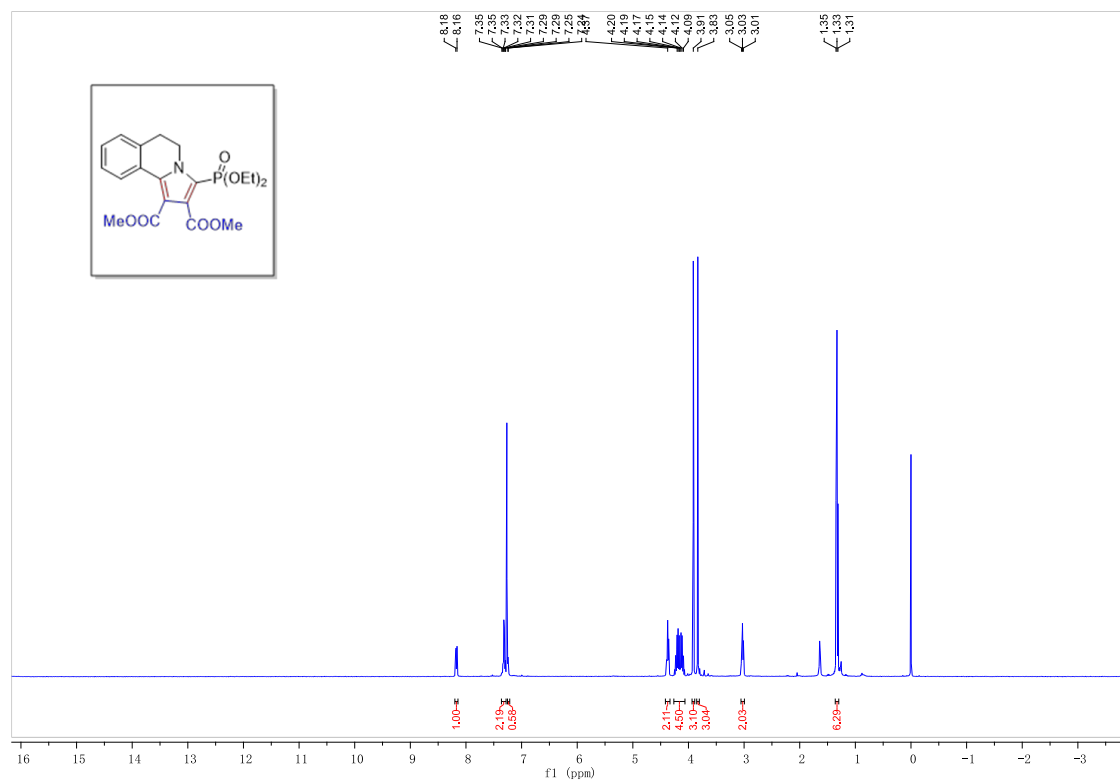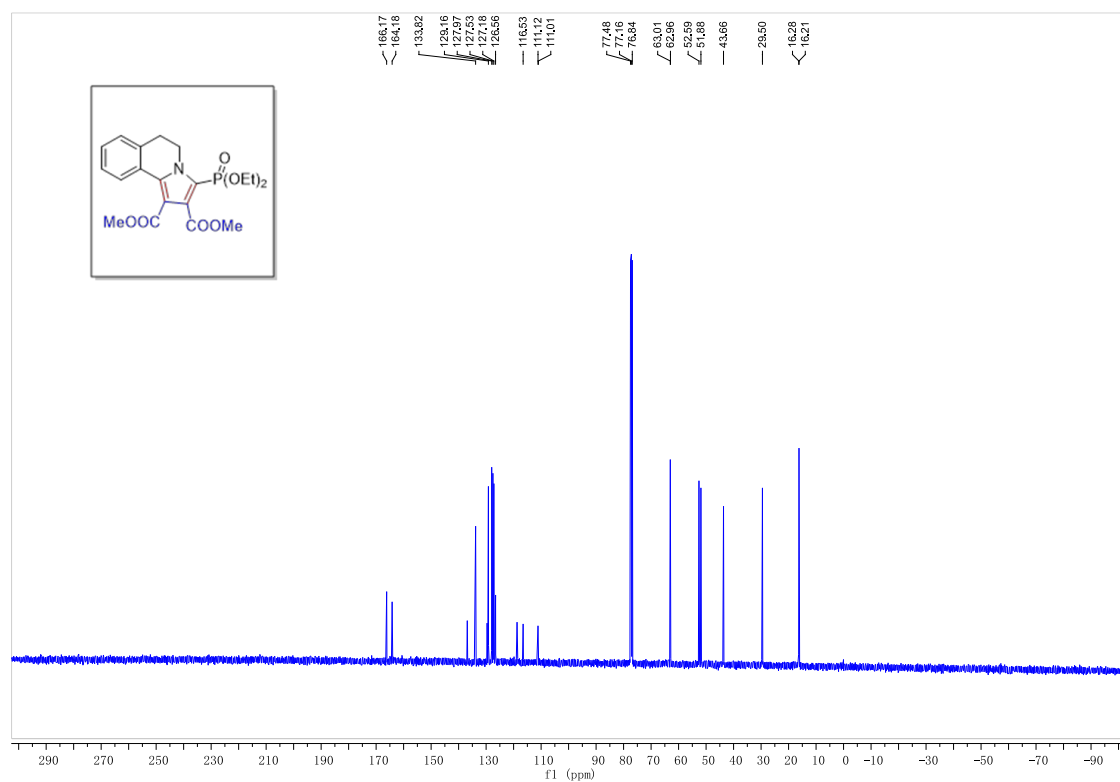

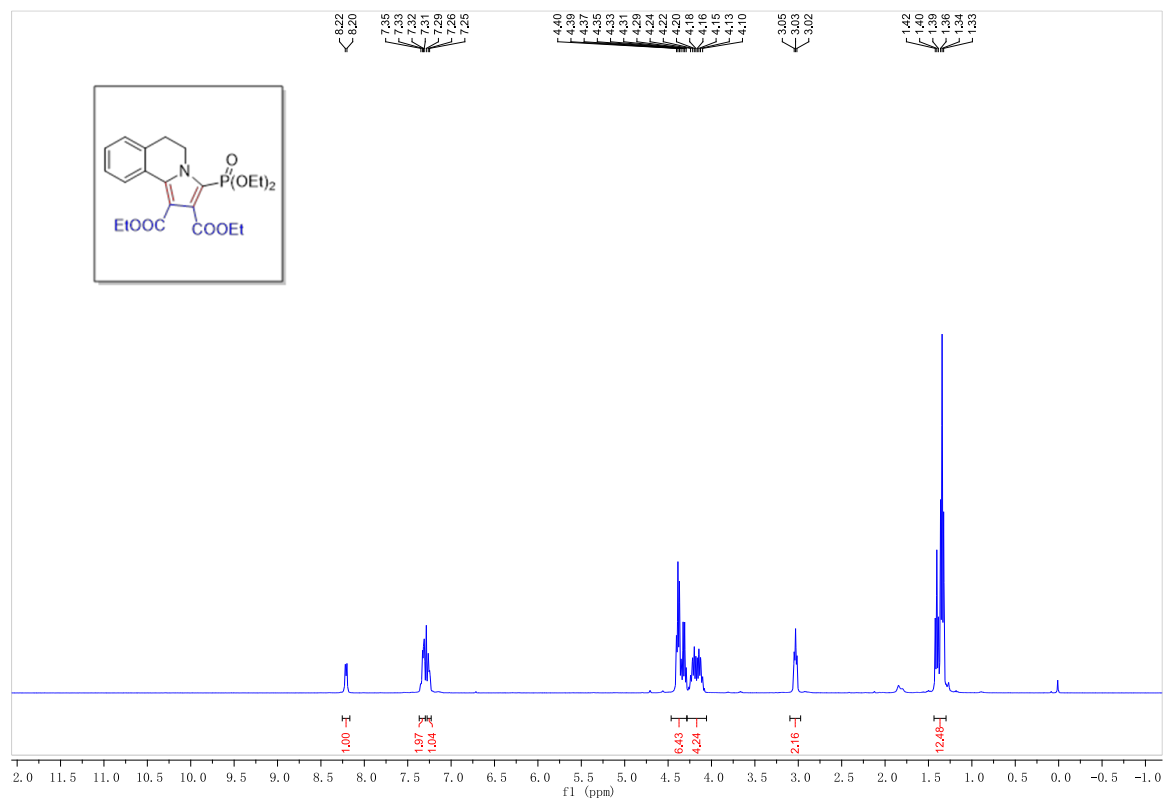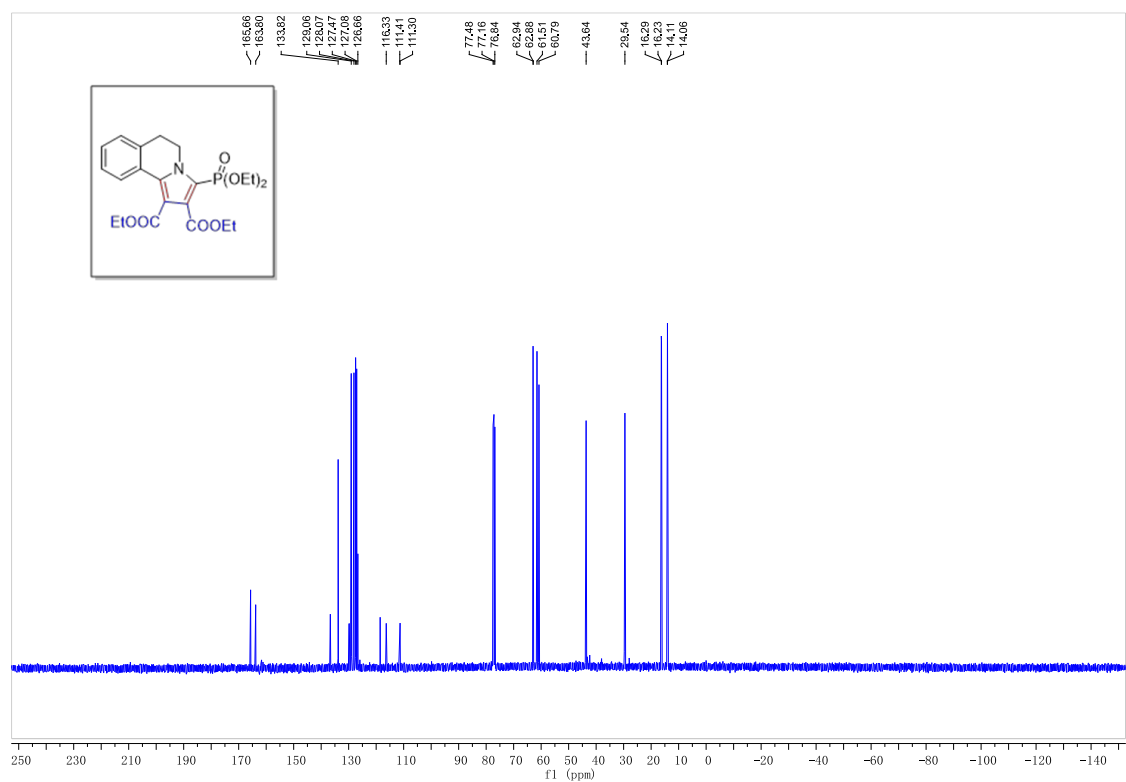

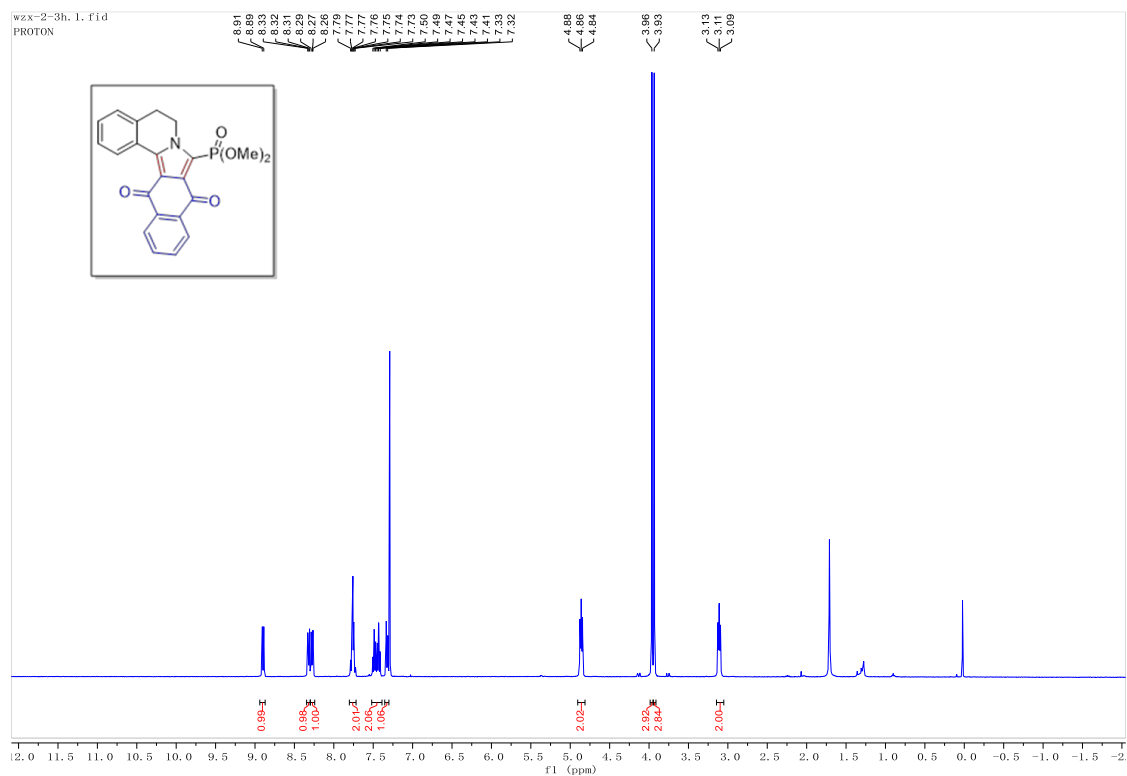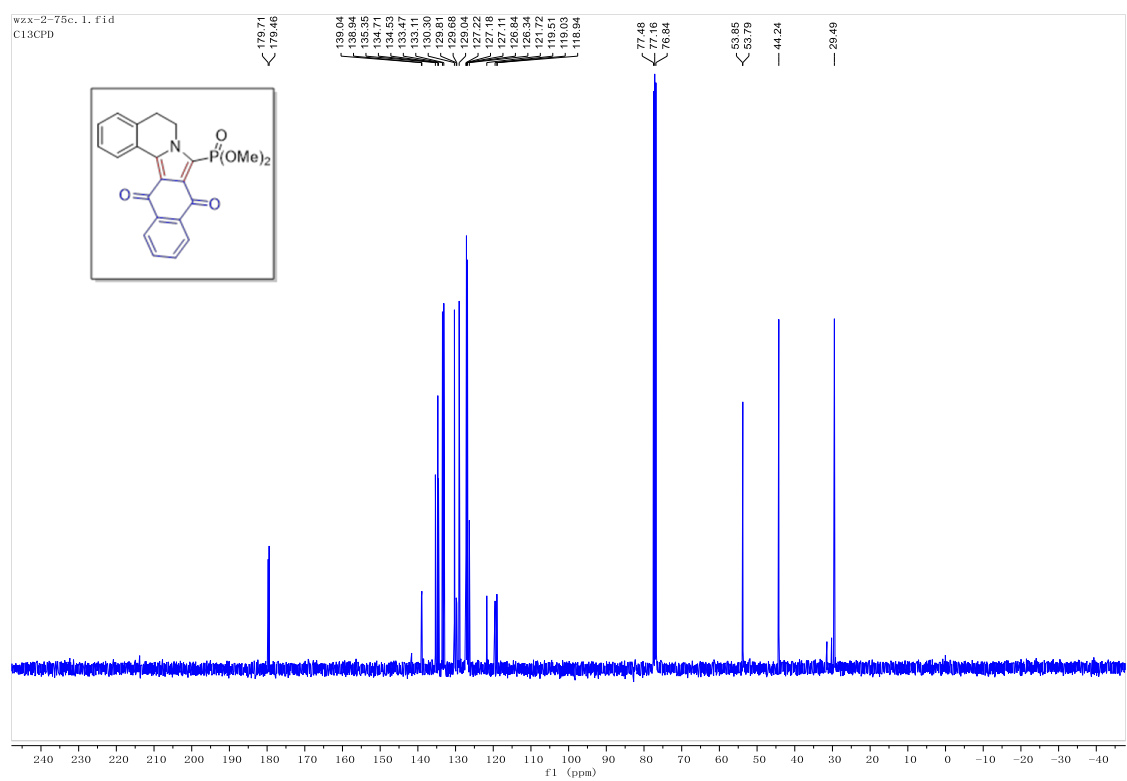

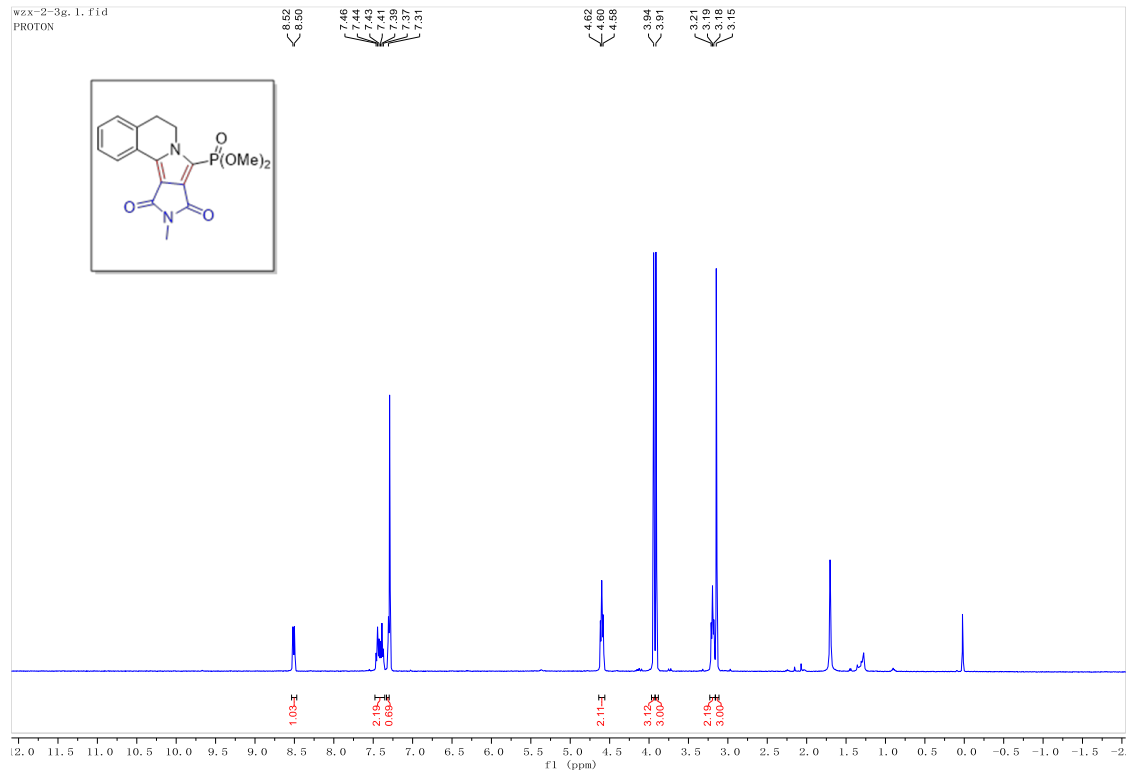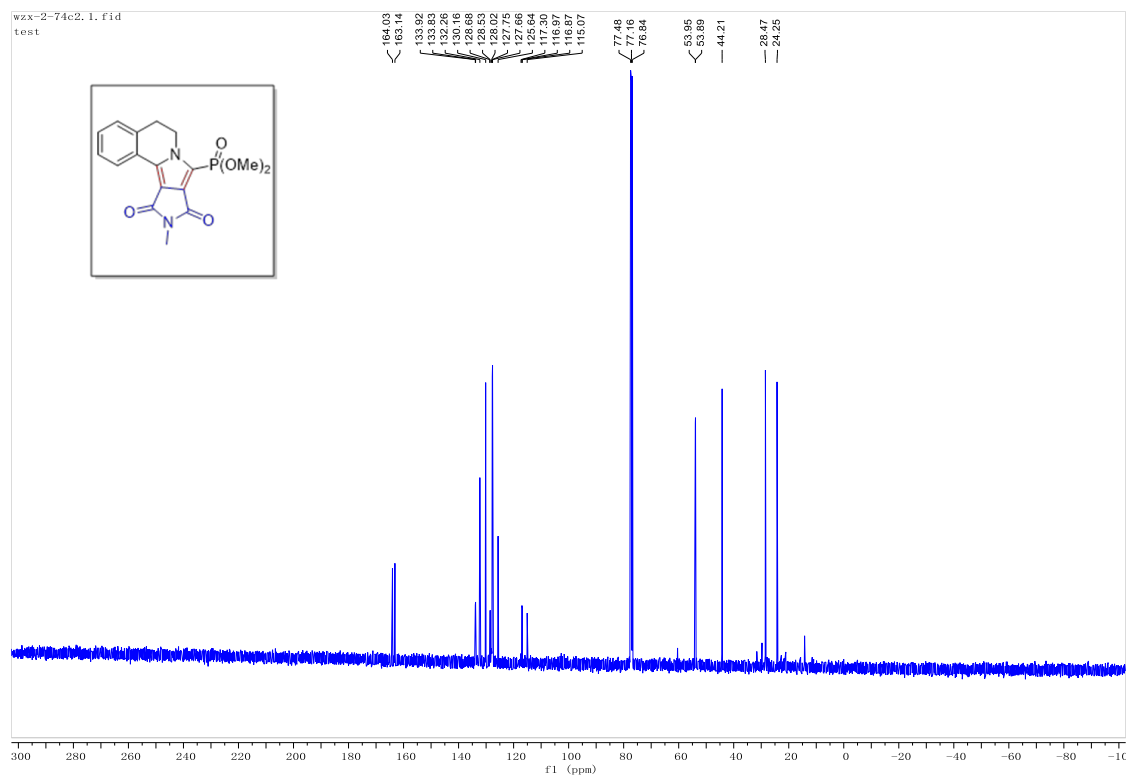

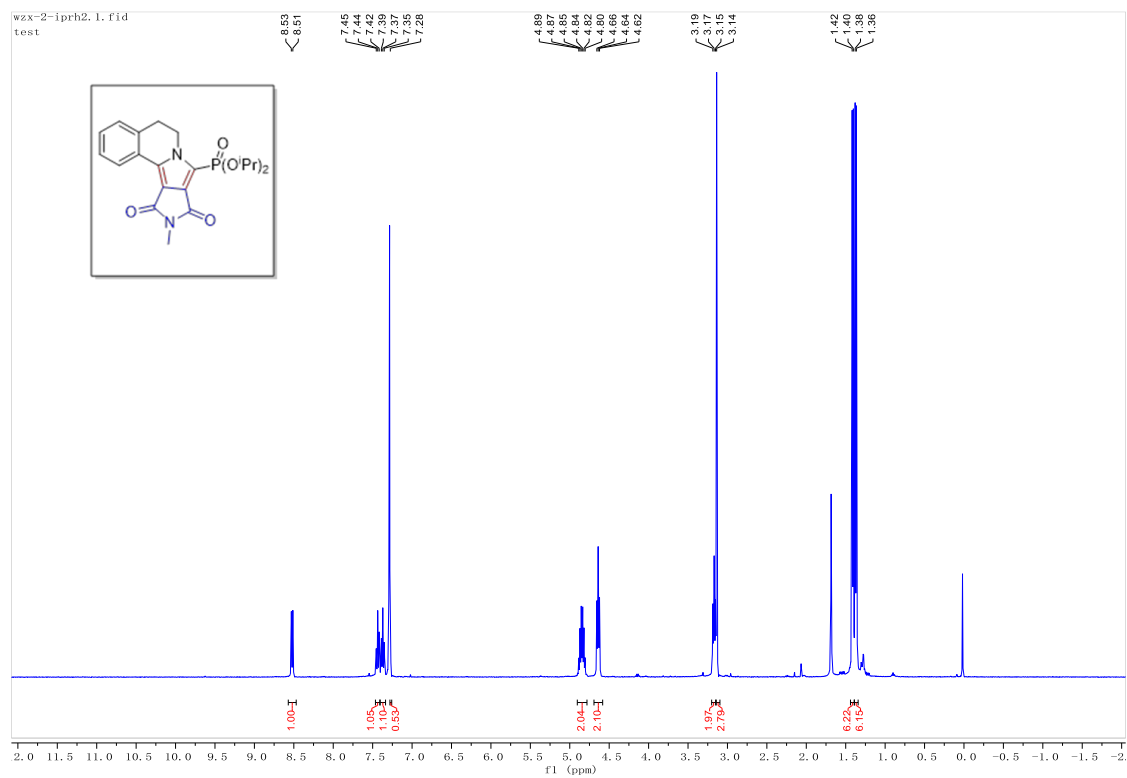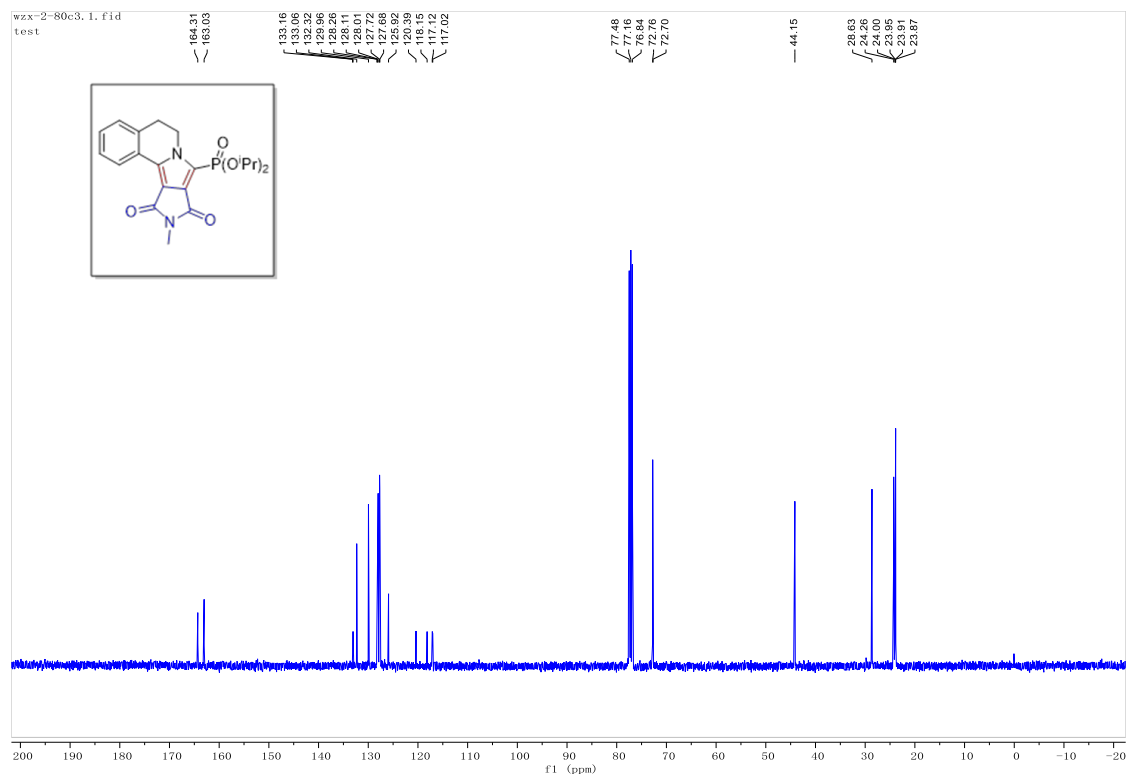



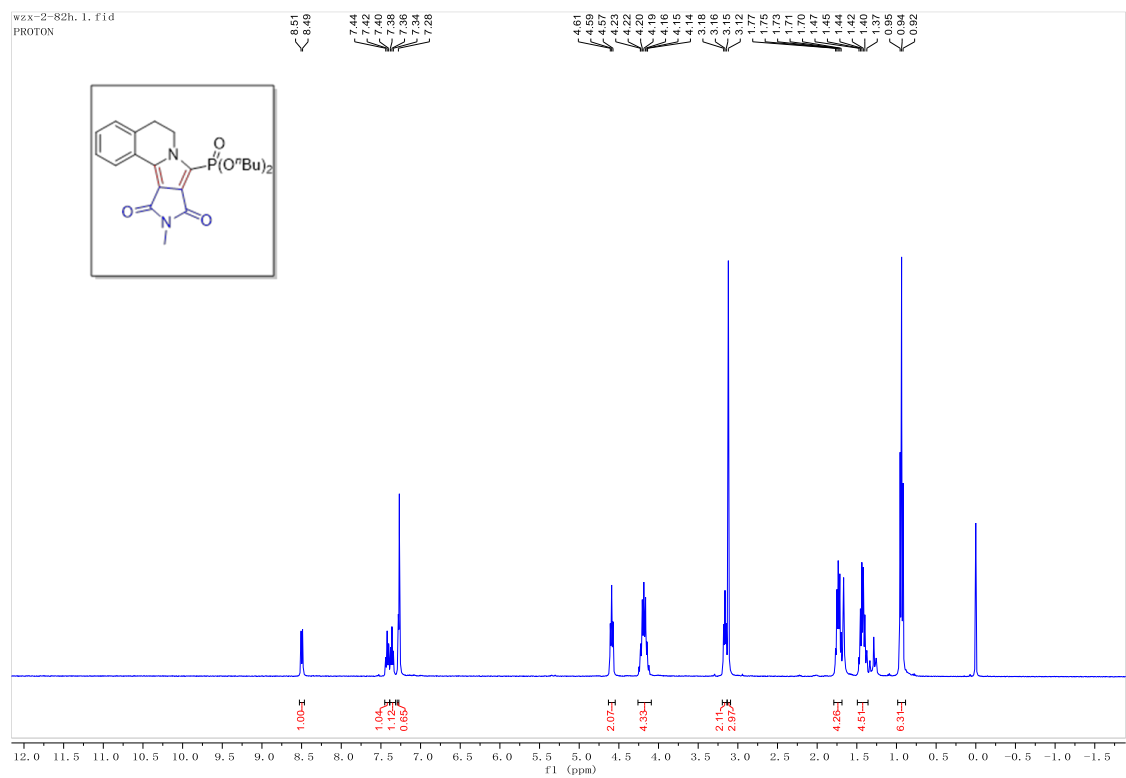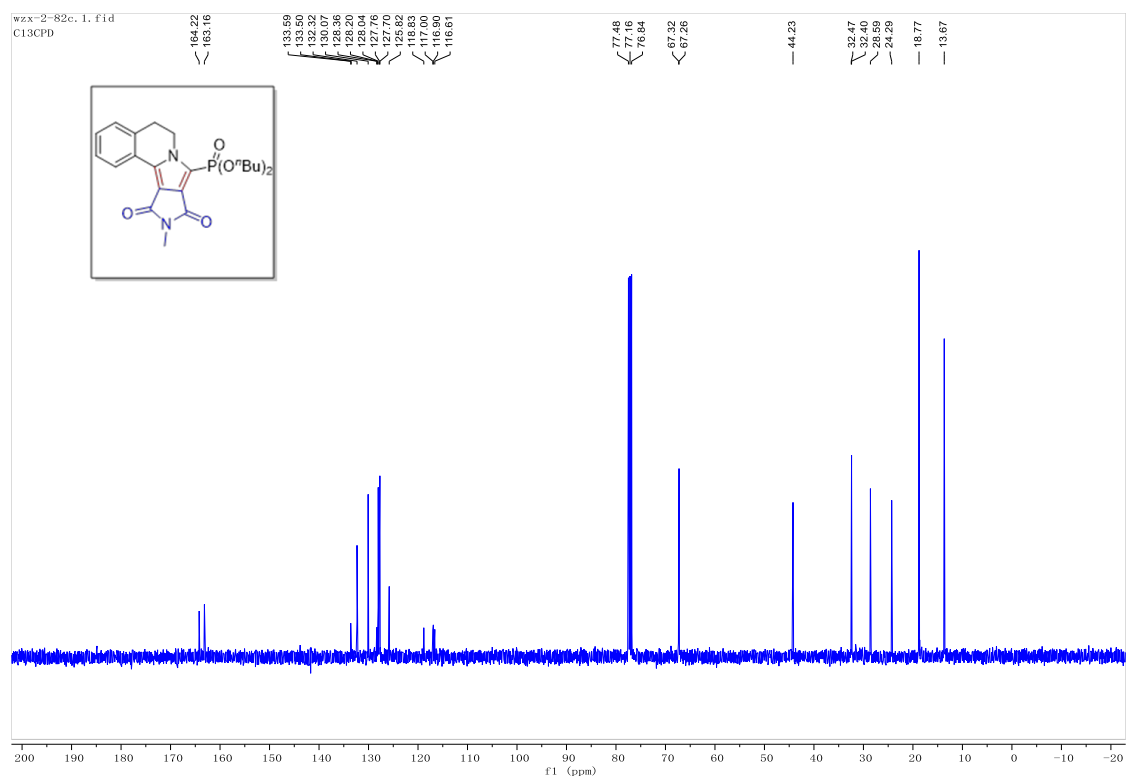

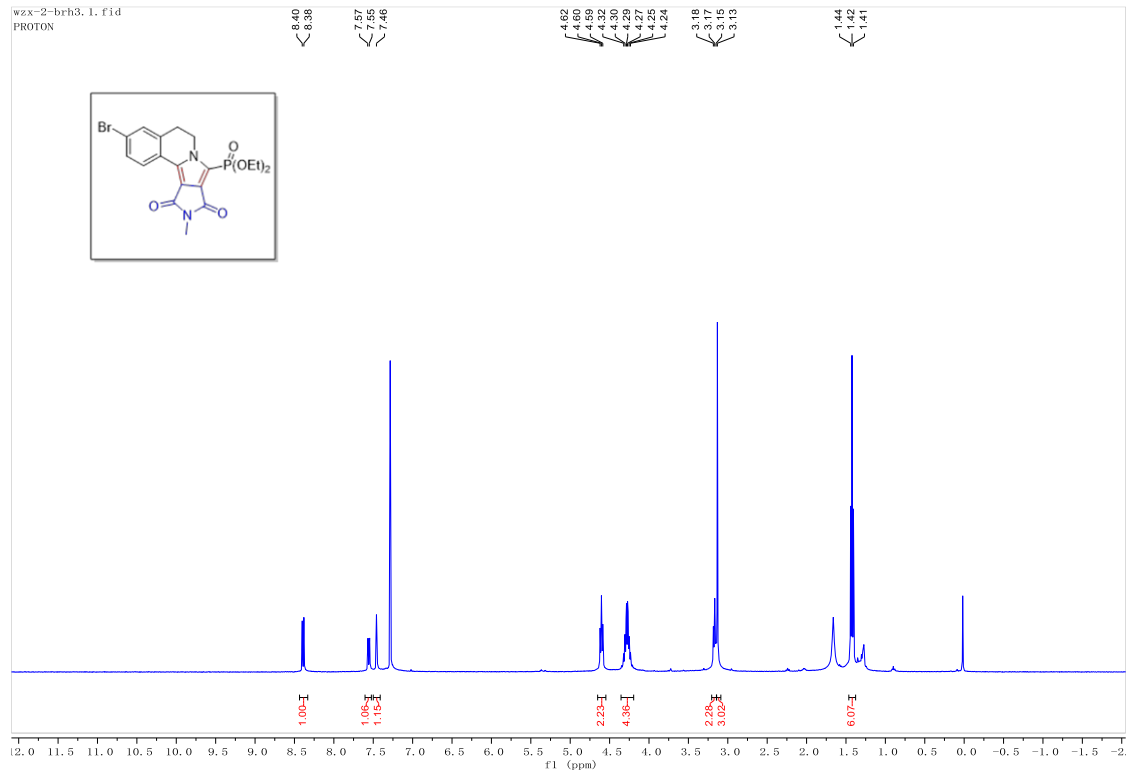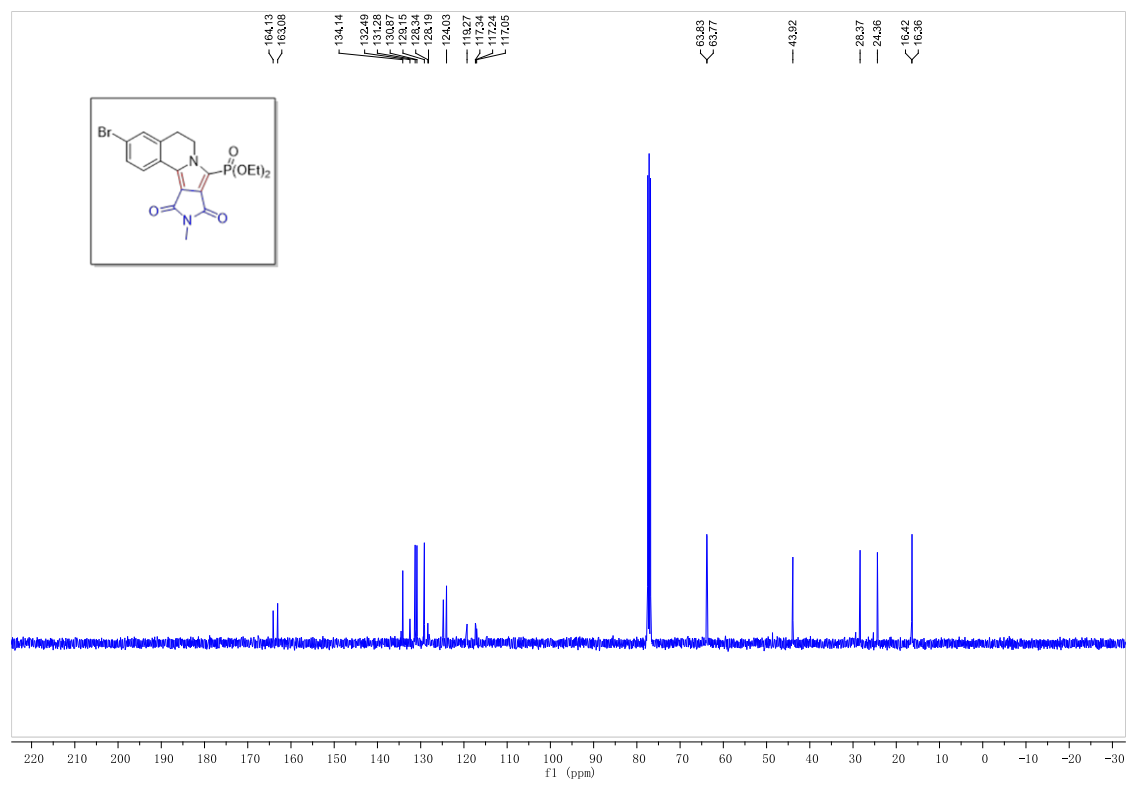

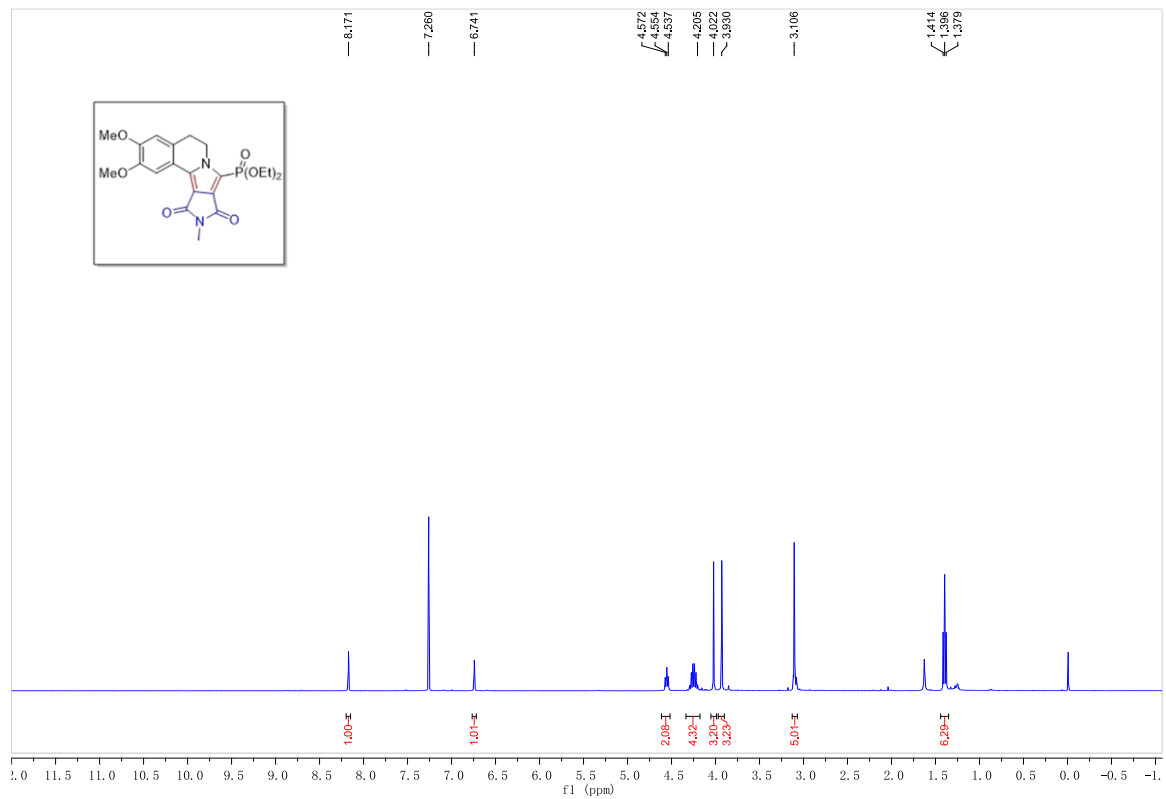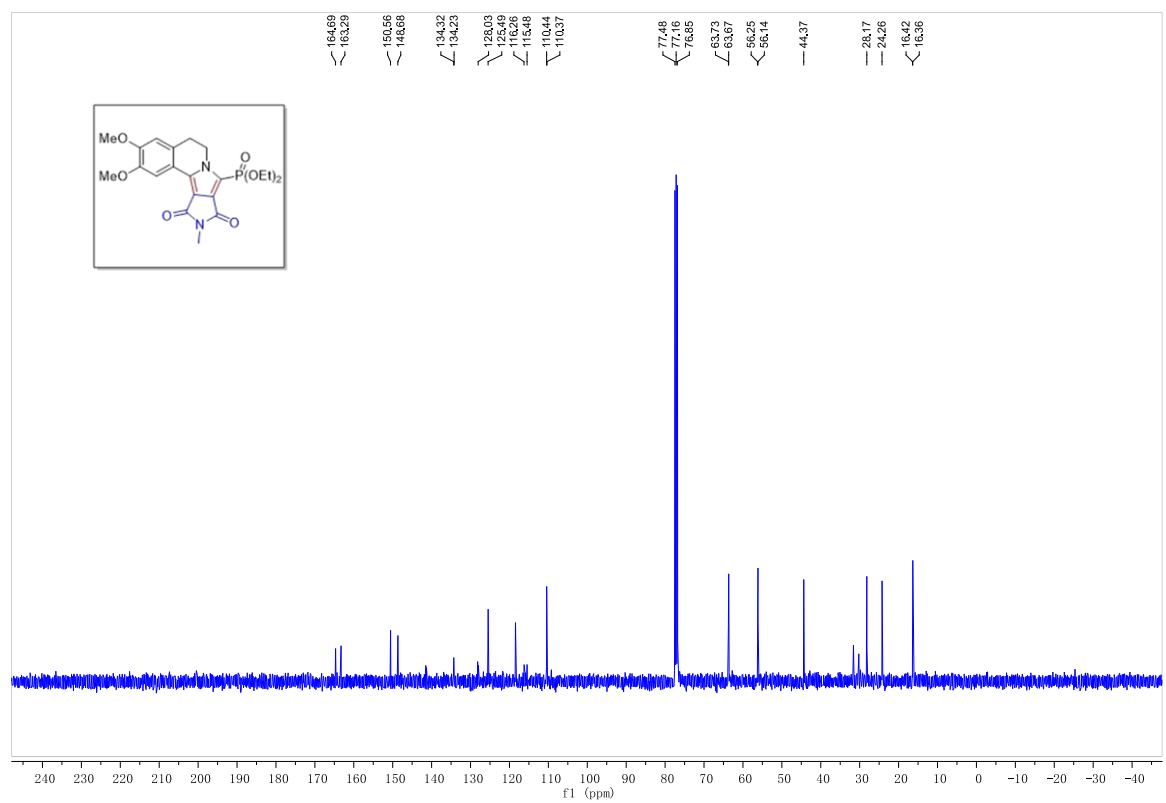

## 9 References

1 T. Yoshii, S. Tsuzuki, S. Sakurai, R. Sakamoto, J. Jiang, M. Hatanaka, A. Matsumoto and K. Maruoka, N-Hydroxybenzimidazole as a Structurally Modifiable Platform for N-Oxyl Radicals for Direct C–H Functionalization Reactions, *Chem. Sci.*, 2020, **11**, 5772.
